# Supplementary material for: Does the Patient-Reported Apnea Questionnaire (PRAQ) increase patient-centredness in the daily practice of sleep centres? a mixed-methods study
Source: PubMed Central journal article supplement — BMJ Open. 2019 Jun 14;9(6):e025963. doi: 10.1136/bmjopen-2018-025963 (PMC6585829; doi:10.1136/bmjopen-2018-025963), 2019-06-14
Supplement: bmjopen-2018-025963.draft_revisions.pdf [file bmjopen-2018-025963.draft_revisions.pdf]

# BMJ Open

BMJ Open is committed to open peer review. As part of this commitment we make the peer review history of every article we publish publicly available.

When an article is published we post the peer reviewers' comments and the authors' responses online. We also post the versions of the paper that were used during peer review. These are the versions that the peer review comments apply to.

The versions of the paper that follow are the versions that were submitted during the peer review process. They are not the versions of record or the final published versions. They should not be cited or distributed as the published version of this manuscript.

BMJ Open is an open access journal and the full, final, typeset and author-corrected version of record of the manuscript is available on our site with no access controls, subscription charges or pay-per-view fees (<http://bmjopen.bmj.com>).

If you have any questions on BMJ Open's open peer review process please email [info.bmjopen@bmj.com](mailto:info.bmjopen@bmj.com)

# BMJ Open

## Does the Patient-Reported Apnea Questionnaire (PRAQ) increase patient-centeredness in the daily practice of sleep centers? A mixed-methods study.

|                               |                                                                                                                                                                                                                                                                                                                                                      |
|-------------------------------|------------------------------------------------------------------------------------------------------------------------------------------------------------------------------------------------------------------------------------------------------------------------------------------------------------------------------------------------------|
| Journal:                      | <i>BMJ Open</i>                                                                                                                                                                                                                                                                                                                                      |
| Manuscript ID                 | bmjopen-2018-025963                                                                                                                                                                                                                                                                                                                                  |
| Article Type:                 | Research                                                                                                                                                                                                                                                                                                                                             |
| Date Submitted by the Author: | 10-Aug-2018                                                                                                                                                                                                                                                                                                                                          |
| Complete List of Authors:     | Abma, Inger; Radboudumc, IQ healthcare<br>Rovers, Maroeska; Radboudumc, Health Evidence and Operating Rooms<br>IJff, Marijke; ApneuVereniging<br>Hol, Bernard; Albert Schweitzer Ziekenhuis, Sleep centre<br>Nägele, Masha; Radboudumc, IQ healthcare<br>Westert, Gert; Radboudumc, IQ healthcare<br>Van der Wees, Philip; Radboudumc, IQ healthcare |
| Keywords:                     | SLEEP MEDICINE, patient-reported outcome measure, obstructive sleep apnea, quality of life, Quality in health care < HEALTH SERVICES ADMINISTRATION & MANAGEMENT                                                                                                                                                                                     |
|                               |                                                                                                                                                                                                                                                                                                                                                      |

SCHOLARONE™  
Manuscripts

1  
2  
3 **Does the Patient-Reported Apnea Questionnaire (PRAQ) increase patient-centeredness in the daily**  
4 **practice of sleep centers? A mixed-methods study.**  
5

6  
7 Inger L. Abma, MSc<sup>1</sup>, Prof. Maroeska Rovers<sup>2</sup>, Marijke IJff<sup>3</sup>, Bernard Hol, MD<sup>4</sup>, Masha E. Nägele<sup>1</sup>, BSc, Prof.  
8 Gert P. Westert<sup>1</sup>, Prof. Philip J. van der Wees<sup>1</sup>  
9

10  
11  
12  
13  
14 <sup>1</sup> Radboud University Medical Center, Radboud Institute of Health Sciences, IQ healthcare, Nijmegen, the  
15 Netherlands

16  
17 <sup>2</sup> Radboud University Medical Center, Radboud Institute of Health Sciences, Departments for Health Evidence  
18 and Operating Rooms, Nijmegen, The Netherlands

19  
20 <sup>3</sup> ApneuVereniging, Doorn, The Netherlands

21  
22 <sup>4</sup> Albert Schweitzer Ziekenhuis, Sleep Center, Dordrecht, The Netherlands  
23  
24  
25  
26  
27  
28

29 Corresponding author:

30 I.L. Abma

31 e-mail: [Inger.abma@radboudumc.nl](mailto:Inger.abma@radboudumc.nl)

32 tel: +31 24 3616359  
33  
34  
35

36 Adres:

37 Radboud University Medical Center

38 IQ healthcare

39 PO box 9101, huispost 114

40 6500 HB, Nijmegen  
41  
42  
43  
44

45 ORCID iDs

46 I.Abma: 0000-0002-3307-6736

47 M. Rovers: 0000-0002-3095-170X

48 G. Westert: 0000-0003-3744-8207

49 P. van der Wees: 0000-0003-2881-5159  
50  
51  
52

53 Word count: 4370  
54  
55

56 Keywords: Obstructive sleep apnea, quality of life, patient-reported outcome measure, patient-centeredness  
57  
58  
59

## Abstract

**Objectives:** The objective of this pilot study was to see how the Patient-Reported Apnea Questionnaire (PRAQ) impacts the daily clinical practice of sleep centers, and why it may or may not work as expected. The hypotheses were tested that this patient-reported outcome measure (PROM) empowers patients, and that it improves patient-centeredness of care by shifting the focus of care away from (only) medical problems towards the individual burden of disease and quality of life.

**Design:** Mixed methods. The quantitative study (surveys, patient records) was a before-and-after study.

**Setting:** Three sleep centres in The Netherlands (secondary care).

**Participants:** 27 patients and 14 healthcare professionals were interviewed. A total of 487 patients completed surveys pre-implementation, and 344 patients completed surveys post-implementation of the PRAQ. For the patient records, 125 patients were included in the pre-implementation group, and 124 other patients in the post-implementation group.

**Interventions:** the PRAQ was used in clinical practice for six successive months.

**Primary and secondary outcome measures:** Scores on individual survey items designed for the study, number of patients receiving non-medical treatment, adjustment of treatment at first follow-up, compliance with treatment.

**Results:** Patients were willing to complete the PRAQ and were generally positive about the usefulness of the PRAQ before and during the consultation. However, amongst healthcare professionals the willingness to make the PRAQ-report part of their consultations differed, and they reported minor impact on their consultations. The surveys and patient record study did not show an impact of the PRAQ on clinical practice.

**Conclusions:** Implementing the PRAQ may increase patient empowerment, but this study does not show much impact with regard to patient-centeredness of care. New Dutch guidelines for OSA care may lead to a greater emphasis on quality of life and value of care for patients, making its integration in clinical care potentially more useful.

## Article summary

### Strengths and limitations of this study

- The mixed methods approach of this pilot study is its major strength: the study provides insight into the reasons why the PRAQ does not work as intended
- The patient survey may not have been discriminative enough to show differences between the groups pre- and post-implantation of the PRAQ
- Patient records were only studied in one of the included sleep studies – however taking into account the interview results we do not expect different results in the other centers
- The PRAQ was in practice not used for follow-up consultations as often as intended, making evaluation of its use in this setting less robust

## 1. Introduction

The integration of patient-reported outcome measures (PROMs) in clinical practice has been gaining popularity in the past decade (1-3). PROM data collected in clinical practice can be aggregated and used for quality improvement purposes, or individual scores can be used in daily clinical practice to improve patient care. In this latter function PROMs can be used in different ways, e.g. as a screening tool, a monitoring or evaluation tool, a tool to inform and empower patients, and/or to increase the patient-centeredness of care by shifting the focus of care away from (only) medical problems towards the problems patients experience in their daily life (4). When using PROMs in daily clinical practice, it may be sensible to combine the use of a PROM on an individual patient level with application on an aggregate level (5). There have been a number of studies that aimed to evaluate the usefulness of PROMs in clinical practice in a variety of settings, of which the results are mixed (6-8). Though qualitative research on this topic has been synthesized in a recent review (4, 9) including a list of hypotheses on how PROMs might work, there are still many questions regarding which PROMs can be potentially useful in which settings.

This study is focused on the application of individual PROM scores in sleep centers which diagnose and treat patients with obstructive sleep apnea (OSA), a condition for which a PROM could be a useful tool to improve patient-centeredness of care. OSA is a highly prevalent but often unrecognized condition in which frequent collapse of the upper airway causes breathing stops while asleep. The subsequent arousals can result in severe sleepiness and fatigue during the day, often affecting a patient's cognitive function, psychological well-being, relationships, and ability to work (10-12). OSA has also been shown to be an independent risk factor for hypertension, heart failure and diabetes (13-15). The prevalence of OSA has been reported to be 6% to 38%, depending on the exact definition of OSA and the population studied, and is higher in men (16).

Severity of OSA and necessity for treatment has historically been based on the number of (partial) breathing stops per hour: the apnea-hypopnea index (AHI)(17, 18). However, there is no linear association between AHI and severity of symptoms or the presence of comorbidities (19-23). There is also little evidence that treating patients with mild OSA (based on AHI) or patients with low sleepiness is useful in preventing cardiovascular disease or incidents (24-27). In the past few years there has therefore been international discussion regarding new approaches to diagnose "clinically relevant" OSA (28, 29). This discussion has also made its way into recent Dutch guidelines for OSA, in which it is recommended that there should be a greater focus on the presence of potentially related comorbidities, as well as the experienced burden of disease for individual patients. The goal of treatment is the improvement of these aspects of OSA (30).

We have developed and validated a PROM for use in clinical practice which may aid this new focus of care for patients with OSA: the Patient-Reported Apnea Questionnaire (PRAQ)(31, 32), which measures OSA-related quality of life. The goal of this PROM is to improve patient-centeredness of care on an individual level by shifting the conversation away from the medical problems and towards and individual's burden of disease/quality of life, and also to measure of quality of care on an aggregate level. To develop the PRAQ, the input from patients and healthcare professionals was used to select the topics that were considered most important to discuss in clinical practice (31). The individual PRAQ scores of each patient with (suspected) OSA are captured in the 'PRAQ-report', which was designed together with patients and uses colored smileys to show the results for the 10 domains of the PRAQ.

1  
2  
3  
4  
5  
6  
7  
8  
9  
10  
11  
12  
13  
14  
15  
16  
17  
18  
19  
20  
21  
22  
23  
24  
25  
26  
27  
28  
29  
30  
31  
32  
33  
34  
35  
36  
37  
38  
39  
40  
41  
42  
43  
44  
45  
46  
47  
48  
49  
50  
51  
52  
53  
54  
55  
56  
57  
58  
59  
60

This explorative pilot study aims to study the effect of the PRAQ and PRAQ-report on patient empowerment and patient-centeredness of care. A combination of both qualitative and quantitative methods is used that will add to the general knowledge on the circumstances under which PROMs do or do not work in clinical practice.

## 2. Methods

This article describes a pilot study in which the PRAQ is implemented in the clinical practice of three sleep centers. Qualitative interviews and a patient survey are used to explore patients' and healthcare providers' experiences with the PRAQ, and to identify potential barriers and facilitators to its use. Additionally, data are collected from patient records to study whether the hypotheses about the potential impact of the PRAQ mentioned in the introduction are correct. For the patient survey and the patient record study we conducted a before-and-after study. The different methods are described in more detail in the next sections.

### 2.1 Hypotheses

We have several hypotheses regarding how the PRAQ may influence patients and healthcare professionals, and how this could impact clinical practice. First of all, completing the PRAQ could:

- Encourage patients to consider which problems they experience that might be related to OSA and that they might want to discuss
- Aid healthcare professionals in opening a conversation about an individual patient's burden of disease (apnea-related quality of life)
- Aid healthcare professionals to evaluate treatment and identify problems that are still present

We think that this may potentially lead to:

- Higher patient compliance with treatment
- More explicit choices regarding whether clinical treatment for OSA is (potentially) beneficial to the patient
- An increase in referrals to other healthcare providers, such as psychologists
- More 'holistic' care, in which there is increased attention for the well-being of patients, including the psychological and social effects of OSA and its comorbidities

### 2.2 The PRAQ and its implementation

The PRAQ and its complementary PRAQ-report were designed with the input of patients with OSA and healthcare professionals (31). More information about the PRAQ-report and how the PRAQ was implemented into clinical practice can be found in Supplementary File 1.

### 2.3 Setting and subjects

Sleep centers of three Dutch hospitals took part in the study. The PRAQ was part of the clinical practice routine of these centers for six successive months. The PRAQ was distributed to patients attending an intake consultation for possible OSA (which takes place after a patient's diagnostic sleep study), and subsequently to

1  
2  
3 the subselection of these intake patients diagnosed with OSA who returned for a follow-up consultation after  
4 starting treatment.  
5

#### 6 7 *2.4 Interviews*

8 In-depth, semi-structured interviews were conducted with patients and healthcare professionals. The interview  
9 guides contained broad, open questions as well as more specific questions informed by topics previously  
10 identified in the literature(4). For patients the main goal was to assess whether completing the PRAQ was  
11 acceptable to them, and to find out the impact that the PRAQ and PRAQ report had for them on the (preparation  
12 for) the consultation. For healthcare providers, questions were mostly focused on how they used the PRAQ and  
13 why they used it this way, and the impact the use of the PRAQ has on their practice. This information can  
14 provide the basis for interpreting the results of the patient record study.  
15  
16  
17

18  
19 Patients were invited via email by the sleep center before their scheduled consultation, or by their healthcare  
20 professional directly after their consultation. We interviewed a total of 27 patients, with a mean age of 59 (range  
21 31-82), nine of whom were women. Education level ranged from primary school to PhD. 18 patients were  
22 interviewed after their intake consultation, the other nine patients were interviewed after their first follow-up  
23 consultation after starting treatment for OSA. Four were interviewed together with their partner or child who had  
24 also attended the consultation. 22 patients had seen the PRAQ-report at home and/or during the consultation at  
25 the time of the interview, while five patients had completed the PRAQ but had not seen the PRAQ-report.  
26  
27

28 All healthcare professionals of the three participating sleep centers that had had the option to work with  
29 the PRAQ were invited to participate. This resulted in interviews with 14 healthcare professionals: six  
30 pulmonologists, six physician assistants (PAs) and two nurses. Two pulmonologists refused an interview because  
31 they had not seen many patients for OSA, two others because they had not used the PRAQ at all, and one PA  
32 refused for personal reasons. At least four healthcare professionals were interviewed at each of the three sleep  
33 centers.  
34  
35

36 All interviews were audiotaped and transcribed verbatim. All interviewees were provided with  
37 information about the study and signed an informed consent form or gave verbal informed consent on the  
38 audiotape. Analysis of the interviews took place via open coding, with different code books for patients and  
39 healthcare providers. IA and MN coded five interviews independently for both patients and healthcare  
40 professional interviews. A researcher (IG) experienced in qualitative research and knowledgeable about PROMs,  
41 but not involved in the study, coded one of the healthcare professional interviews independently. IG, IA, MN and  
42 PW held a collaborative coding session in which the code books were constructed. IA and MN then both  
43 analyzed all remaining interviews and reached consensus about the coding.  
44  
45  
46  
47

#### 48 49 *2.5 Surveys*

50 The patient survey was designed for this study to study potential differences in patient empowerment and  
51 patient-centeredness of care before and after the implementation of the PRAQ. The items of the survey covered  
52 how prepared patients felt for their consultation, whether there was discussion of the health problems that  
53 patients consider relevant during the consultation, and whether patients were motivated to start their treatment.  
54  
55  
56  
57  
58  
59

1  
2  
3 Patients could indicate their agreement on several statements on these topics with the statement on a 7-point  
4 Likert scale.

5 Surveys were distributed by healthcare professionals to all of their patients attending either an intake or  
6 first follow-up consultation for (suspected) OSA. Distribution of the surveys took place in the two months before  
7 implementation of the intervention (control group), and in the last two months of the six months that the  
8 intervention was part of daily clinical practice (intervention group). For the intervention group, the survey also  
9 contained additional questions about the patient's opinion on the usefulness of the PRAQ. Participation was  
10 voluntary and anonymous. Survey data was analyzed per item with non-parametric tests.  
11  
12  
13

### 14 *2.6 Patient records*

15 Patient records from one of the included sleep centers were studied to explore potential changes in treatment and  
16 compliance resulting from the use of the PRAQ. Data were collected from patients with an  $AHI \geq 5$  attending an  
17 intake consultation during the final two months of the study period and during the same time period the previous  
18 year. Information was collected about treatment choice at intake, treatment adaptations at the first follow-up  
19 consultation, compliance with treatment, and patient characteristics. Compliance data is only available for  
20 patients who receive Continuous Positive Airway Pressure (CPAP), the most commonly prescribed treatment for  
21 patients with OSA. As part of standard care, hours of use are registered by the CPAP device and entered into the  
22 patient record at follow-up consultations. CPAP compliance is expressed as average hrs CPAP use/night in the  
23 month before the follow-up consultation, with an average of 4 hrs/night generally being the minimum to be  
24 considered compliant(33).  
25  
26  
27  
28

29 No identifying information was collected from the patient records. The data collection procedure  
30 guaranteed that the records would at all times remain anonymous to the researchers.  
31  
32

### 33 *2.7 Patient and Public Involvement*

34 A board member (author MI) of the Dutch patient organisation for OSA (Apneuvereniging) was involved with  
35 this study from its inception, including the research question and outcome measures and interpretation of the  
36 results. This author was also closely involved in the development of the intervention itself (the PRAQ and its  
37 complementary PRAQ-report), as were other members of the patient organization (31). They also approved of  
38 the burden and time required for the intervention. Patients were not involved in the recruitment for the study.  
39  
40  
41  
42

## 43 **3. Results**

### 44 *3.1 Interviews*

#### 45 Patient perspective

46 Patients were generally willing to complete the PRAQ before their consultation, and patient response as reported  
47 by the healthcare professionals was high. About half of the interviewed patients indicated that completing the  
48 PRAQ helped them prepare for their intake consultation by giving them more insight into their complaints and  
49 functioning and how this might relate to OSA, and/or made them consider what they wanted to discuss with the  
50 healthcare professional. Many patients completed the PRAQ with a family member which instigated discussions  
51  
52  
53  
54  
55  
56  
57  
58  
59  
60



1  
2  
3 patients often considered useful. Patients considered the smileys of the PRAQ-report a clear and easy way of  
4 communicating the results. Box 1 contains quotes illustrating the statements in this paragraph.

5  
6 The interviews also revealed some unintended effects of the PRAQ. A majority of patients assumed that  
7 the main purpose of the PRAQ was to aid their healthcare professional in setting a diagnosis, by providing  
8 information about symptoms ahead of time. A few patients believed that discussion of patient complaints during  
9 the consultation was therefore no longer necessary after completing the PRAQ, while healthcare professionals  
10 consider this discussion very important (see next section). Additionally, there were some issues around the  
11 interpretation of the smileys in the PRAQ-report. Several of the interviewed patients did not seem to view the  
12 PRAQ-report as merely a visualization of the answers they had given, but rather as a 'test result'. Some  
13 considered the number of 'unhappy' smileys as an indication of whether they were doing well or not, which  
14 made some patients reconsider the severity of their complaints (Box 2).  
15  
16  
17  
18

19 Box 1:

20 "Look, it's just very insightful. You can see instantly where the problems are and on this other [page] you can  
21 see what the improvements are. Yes, it's kinda nice." (Centre 3, patient 10)

22  
23 "Yes, you know I do find it useful, because you have so many... so many things that bother you, that you forget  
24 what it is that bothers you. Or because it has become part of you, so to say. So yeah in order [not] to forget  
25 things, a questionnaire like this comes in handy." (Centre 2, patient 1)

26  
27 "But there were quite a lot of questions where I was like, oh, sometimes I'm like, how does that fit with  
28 [apnea]? But most did, but there were questions where I was like, is that related to sleep apnea? So. Yes.  
29 Apparently." (Centre 3, patient 7)

30  
31 "Actually I liked [seeing it beforehand], because this way I can by myself... otherwise I would have gone into it  
32 timidly like, tell me, what did you see? And now I could ask specific questions."  
33 (Centre 3, patient 2)

34  
35  
36 Box 2:

37 "I think it's very good, because you can from the beginning very clearly indicate your problems. So it doesn't  
38 need to all be done during the short conversation you have with the specialist. [...] It's clear it doesn't need to be  
39 mentioned again, because it's clear to her as well what the problems are." (Centre 1, patient 4)

40  
41 "Just that when you complete a questionnaire aimed at establishing something, then it's useful that you also get  
42 a sort of result. So a preliminary... not that you should instantly think like nothing is wrong, nothing needs to be  
43 done, let's get out of here. But, I did like it, yeah." (Centre 1, patient 3)

44  
45 "Well, because there were only two orange [smileys], and the others were all green and then you think, well....  
46 And then when you look at it again then I'm like, 'I can live with that'." (Centre 2, patient 7)

1  
2  
3 Willingness to use the PRAQ among professionals was moderate: one did not use it at all, a few put effort into  
4 exploring its potential benefits, and most used it in a more perfunctory manner. Some professionals stated that  
5 this was due to unwillingness to change their practice, while others mentioned a general aversion to  
6 questionnaires, and/or not being convinced that the PRAQ would offer new or useful information considering  
7 what was already discussed during a regular consultation. There were also practical issues that to some extent  
8 hindered the uptake of the PRAQ: most notably the (limited) time available for consultations, and the fact that  
9 the PRAQ was not embedded in the patient records which hindered the regular workflow. There were no notable  
10 differences in attitude towards the PRAQ between physicians, PAs and nurses.

11  
12  
13 Most of the professionals that used the PRAQ did so at the end of their usual discussion of symptoms,  
14 to check whether all topics that were problematic had been discussed and potentially address more topics. As  
15 such they could still start the conversation in their usual way, allowing patients to explain their problems in their  
16 own words, and allowing the healthcare professionals to ask their standard diagnostic questions. Professionals  
17 indicated that most “symptoms” that are part of the PRAQ were already part of the standard diagnostic questions  
18 during an intake consultation (sleepiness, problems at night), and also overlapped with their usual (diagnostic)  
19 intake questionnaire. However, several professionals mentioned that the PRAQ-report increased discussion of  
20 the topic “health concerns”, which was considered valuable. Furthermore, the few professionals that indicated  
21 that they valued offering more holistic care noticed that the PRAQ was useful in drawing the conversation away  
22 from medical facts and more towards the underlying emotions related to a patient’s problems. However, many  
23 other professionals did not see much added value in actively bringing up topics like emotions and social  
24 interactions. They were potentially willing to discuss these issues but considered it up to the patient to raise  
25 them. If the PRAQ was used to identify problems, it was more common for the professional to mention very  
26 briefly that these problems were likely to improve with treatment of OSA, without further discussing these  
27 problems (Box 3). Professionals reported that they did not notice any increase in OSA-related knowledge in their  
28 patients, or a difference in whether or how patients raised health complaints or quality of life issues of their own  
29 accord.

30  
31  
32 With regard to treatment choice, the professionals mentioned that the severity of symptoms generally  
33 only plays a role in patients with an  $AHI < 15$ , for which shared-decision making could potentially lead to a  
34 decision not to start clinical treatment for OSA. If the  $AHI \geq 15$ , professionals generally wish to treat a patient  
35 for health reasons irrespective of symptoms. Many patients also have a reason to opt for treatment: there is a  
36 motor vehicle driving ban for untreated patients with  $AHI \geq 15$ .

37  
38  
39 Use of the PRAQ during follow-up consultations could not be fully evaluated, because a limited number  
40 of patients had completed the PRAQ at follow-up at the time of the interviews. This was due to practical  
41 implementation issues in combination with the relatively short duration of the pilot. However, several healthcare  
42 professionals mentioned that they thought the PRAQ would be more useful during follow-up consultations than  
43 intake conversations, as it would be interesting to see which problems remained after starting treatment. Those  
44 that had the opportunity to use the PRAQ in this setting mentioned that it was nice to show patients how their  
45 problems had improved, with the improvement sometimes greater than the patients had realised. This could be  
46 used as encouragement to continue with treatment.

Box 3:

“Well I myself don’t ask ‘are you worried about your [health]’? I won’t ask that, but that is what it shows. So then... then it’s like ‘hey, I would otherwise not have discussed that’.” (Centre 3, healthcare provider 4)

“Yes, but then in a solution-oriented way - then you will see someone with 30 apneas an hour and you see that and you say I hope that [your problem with emotions] will get a lot better with the therapy I will start for you.” (Centre 1, healthcare provider 2)

“Especially I thought people were, uhm... that lack of initiative, not going out, right? So they don’t do things because of their sleep problem, that was what [the PRAQ] often showed. And I didn’t always get that from taking the patient history. So people maybe find that hard to tell me, or they have trouble indicating that it really does have an impact on them. And then they try to focus more on the fact than on the underlying emotion. And that would sometimes give added value.” (Centre 1, healthcare provider 1)

### 3.2 Survey results

A total of 487 patients completed surveys pre-implementation, and 344 patients completed surveys post-implementation of the PRAQ. Characteristics of the survey populations pre-implementation and post-implementation can be found in table 1. For follow-up patients, the severity of the symptoms or problems that the patients wanted to discuss during the consultation was significantly higher post-implementation than pre-implementation.

Table 1. Characteristics of the survey population

| Intake consultations                                                   |                            |                             |
|------------------------------------------------------------------------|----------------------------|-----------------------------|
|                                                                        | Pre-implementation (n=239) | Post-implementation n=164)  |
| Age (yrs)                                                              | 53.9                       | 55.4                        |
| Gender (% male)                                                        | 68.4                       | 69.5                        |
| Severity of symptoms <sup>1</sup>                                      | 6.50                       | 6.44                        |
| Diagnosed with OSA (%)                                                 | 82.8                       | 83,2                        |
| CPAP <sup>2</sup> (%)                                                  | 71.0                       | 70.7                        |
| MRA <sup>2</sup> (%)                                                   | 13.7                       | 19.5                        |
| Other treatment <sup>2</sup> (%)                                       | 10.7                       | 7.4                         |
| No treatment <sup>2</sup> (%)                                          | 1,0                        | 2.4                         |
| Missing <sup>2</sup> (%)                                               | 3.6                        | 0.0                         |
| Follow-up consultations                                                |                            |                             |
|                                                                        | Pre-implementation (n=248) | Post-implementation (n=180) |
| Age                                                                    | 57.33                      | 58.54                       |
| Gender (% male)                                                        | 75.3                       | 69.7                        |
| Severity of remaining symptoms or problems with treatment <sup>1</sup> | 4.25*                      | 5.03*                       |
| CPAP (%)                                                               | 89.1                       | 89.4                        |
| MRA (%)                                                                | 3.6                        | 3.9                         |
| Other or missing (%)                                                   | 7                          | 5.6                         |

\*Significant difference (p=.01, Mann-Whitney U test)

1. Scale 1-10, higher is more problems

2. Percentage patients with this treatment of the total of patients diagnosed with OSA

1  
2  
3 Patients generally showed high agreement with the statements of the survey: 76.9% - 95.6% of patients indicated  
4 “agree” or “completely agree” per statement (table 2). The lowest agreement pre-implementation of the PRAQ  
5 was for the statement “I discussed with the doctor the topics I wanted to discuss” for intake patients (9.8% of  
6 patients disagreed), which did not significantly improve after implementation of the PRAQ (8.9% of patients  
7 disagreed). The other statements for intake patients also showed no significant differences in the level of  
8 agreement pre- and post-implementation. However, follow-up patients post-implementation showed less  
9 agreement with the statement “In my opinion, my treatment is worth it for me”, with 3.6% fewer patients  
10 indicating “agree” or “completely agree” (p=.005).  
11  
12  
13  
14  
15  
16  
17  
18  
19  
20  
21  
22  
23  
24  
25  
26  
27  
28  
29  
30  
31  
32  
33  
34  
35  
36  
37  
38  
39  
40  
41  
42  
43  
44  
45  
46  
47  
48  
49  
50  
51  
52  
53  
54  
55  
56  
57  
58  
59  
60

Table 2. Survey results

| <b>Intake consultations</b>                                                                   |                                |      |      |                                  |      |      |
|-----------------------------------------------------------------------------------------------|--------------------------------|------|------|----------------------------------|------|------|
| <b>Scores<sup>1</sup></b>                                                                     | <b>Pre-implementation PRAQ</b> |      |      | <b>Post- implementation PRAQ</b> |      |      |
|                                                                                               | 1-3                            | 4-5  | 6-7  | 1-3                              | 4-5  | 6-7  |
| I knew which problems I wanted to discuss with the doctor (%)                                 | 7.2                            | 7.7  | 85.1 | 4.2                              | 7.3  | 88.5 |
| I discussed with the doctor the topics I wanted to discuss (%)                                | 9.8                            | 12.5 | 77.7 | 8.9                              | 12.2 | 78.9 |
| Because of my conversation with the doctor, I understand better what causes my problems (%)   | 6.0                            | 6.0  | 88.0 | 3.1                              | 5.1  | 91.8 |
| The doctor and I chose the treatment together (or chose not to treat my apnea) (%)            | 6.0                            | 5.2  | 88.8 | 3.6                              | 7.3  | 89.1 |
| Because of my conversation with the doctor, I understand how the treatment can benefit me (%) | 5.6                            | 5.5  | 88.9 | 2.2                              | 5.3  | 92.5 |
| I think the treatment will be worth it for me (%)                                             | 4.7                            | 8.0  | 87.3 | 2.2                              | 9.8  | 88.0 |
| <b>Follow-up consultations</b>                                                                |                                |      |      |                                  |      |      |
| I knew which problems I wanted to discuss with the doctor (%)                                 | 4.5                            | 4.6  | 90.9 | 3.4                              | 6.9  | 89.7 |
| I discussed with the doctor the topics I wanted to discuss (%)                                | 4.0                            | 6.6  | 89.4 | 5.7                              | 6.4  | 87.9 |
| There was enough attention for the complaints that I still have (%)                           | 2.0                            | 2.4  | 95.6 | 1.4                              | 1.3  | 97.3 |
| My complaints have lessened since start of my treatment (%)                                   | 8.1                            | 15.0 | 76.9 | 11.5                             | 14.2 | 74.3 |
| In my opinion, my treatment is worth it for me* (%)                                           | 2.7                            | 4.0  | 93.3 | 3.4                              | 6.9  | 89.7 |
| <b>Usefulness of the PRAQ</b>                                                                 |                                |      |      |                                  |      |      |
| The PRAQ-report was useful for preparing my consultation <sup>2</sup>                         | -                              | -    | -    | 9.8                              | 14.6 | 75.6 |
| The PRAQ-report was useful during my consultation <sup>3</sup>                                | -                              | -    | -    | 0.0                              | 10.9 | 89.1 |

\*Significant difference between pre- and post-implementation (p=.005, Mann-Whitney U test)

- Scale 1-7 (1 = completely disagree, 2 = disagree, 3 = disagree a little, 4 = neither agree nor disagree, 5=agree a little, 6=agree, 7= completely agree)
- Showing results for patients who indicated they had seen the PRAQ-report before their consultation (n= 41)
- Showing results of patients who indicated the PRAQ-report was shown during their consultation (n= 46)

Patients showed high agreement with the two statements about the usefulness of the PRAQ-report, particularly regarding its use during a consultation (table 2). However, not all patients had completed the PRAQ and seen the PRAQ-report before or during their consultation, and the number of patients that had completed these items was low (table 3).

Table 3. Percentage of patients that completed and viewed the PRAQ, and patient opinion on usefulness PRAQ

|                                                   | Intake (n=197) | Follow-up (n=180) |
|---------------------------------------------------|----------------|-------------------|
| Completed PRAQ before consultation                | 77.7%          | 51.1%             |
| Seen PRAQ-report before consultation <sup>1</sup> | 40.0%          | 44.4%             |
| Seen PRAQ-report during consultation <sup>1</sup> | 74.1%          | 60.2%             |

1. This percentage is a sub-percentage of the patients who indicated they completed the PRAQ

### 3.3 Patient record results

125 patients were included in the pre-implementation group, and 124 other patients in the post-implementation group. Patient characteristics of the two groups did not differ (table 4). No differences were found with regard to how many patients with OSA received non-medical treatment (either no treatment at all or referral to a psychologist (table 5)), or in the number of patients for whom treatment was adjusted at the first follow-up consultation after starting CPAP treatment (table 6).

In both groups, 98 patients were prescribed CPAP. Patient characteristics did not differ between the two groups of patients with CPAP (data not shown). Compliance with CPAP treatment did not differ between the two groups (table 6).

Table 4. Patient file study: patient characteristics<sup>1</sup>

|                           | Pre-implementation (n=125) | Post-implementation (n=124) |
|---------------------------|----------------------------|-----------------------------|
| Age (SD)                  | 55,4 (12,0)                | 56,6 (15,7)                 |
| Gender                    | 68% male                   | 67,7% male                  |
| BMI (SD)                  | 31,4 (6,5)                 | 30,8 (6,1)                  |
| AHI (SD)                  | 23,1(16,1)                 | 25,0 (18,5)                 |
| AHI < 15                  | 40,8%                      | 33,9%                       |
| ESS (SD)                  | 8,0 (4,8)                  | 7,4 (5,0)                   |
| Start with CPAP at intake | 78,4%                      | 79,0%                       |

1. If nothing is indicated, no significant difference was found.

Table 5. Treatment choice at intake<sup>1</sup>

|                                       | Pre-implementation (n=125) | Post-implementation (n=124) <sup>1</sup> | Pre-implementation, AHI <15 (n=51) | Post-implementation (n=42) |
|---------------------------------------|----------------------------|------------------------------------------|------------------------------------|----------------------------|
| Medical treatment for OSA (incl CPAP) | 98,4                       | 99,2                                     | 96,1                               | 97,6                       |
| No medical treatment for OSA          | 1,6                        | 0,8                                      | 3,9                                | 2,4                        |
| Referred to psychologist (%)          | 1,6                        | 0                                        | 3,9                                | 0                          |
| No treatment (%)                      | 0                          | 0,8                                      | 0                                  | 2,4                        |

1. If nothing is indicated, no significant difference was found.

Table 6. Treatment adjustments and compliance in patients with CPAP at the first follow-up<sup>1</sup>

|                                      | Pre-implementation of PRAQ<br>(n=98) | Post-implementation of PRAQ<br>(n=98) |
|--------------------------------------|--------------------------------------|---------------------------------------|
| Adjustment of current treatment      | 45                                   | 36                                    |
| Switch to different treatment        | 5                                    | 9                                     |
| Referral to different specialization | 6                                    | 2                                     |
| CPAP compliance <sup>2</sup> (SD)    | 5:47 hrs (2:11)                      | 5:53 hrs (2:10)                       |
| CPAP compliance <4hrs                | 25,0%                                | 27,5%                                 |
| Stopped CPAP treatment               | 4,1%                                 | 5,1%                                  |

1. If nothing is indicated, no significant difference was found.

2. Hours of CPAP use by patients who had stopped treatment altogether (see “stopped CPAP treatment”) are not included in this number

#### 4. Discussion

This explorative pilot study showed limited success regarding the uptake of the PRAQ in the daily clinical practice of sleep centers, and the improvement of patient empowerment and patient-centeredness of care. Most patients were willing to complete the PRAQ and were generally positive about the usefulness of the PRAQ before the consultation (e.g. because of feeling more informed) and during the consultation (due to the clear visual representation of their problems). This seems to therefore have led to some empowerment of patients. However, amongst healthcare professionals the willingness to use the PRAQ-report in consultations differed, as the perceived need was minimal. Most of the professionals that used the PRAQ also reported that the impact on their consultations was minor. Therefore, it is not surprising that comparison of patient records pre- and post-implementation of the PRAQ did not show any differences in treatment choice and CPAP compliance.

The interviews showed that the professionals mostly felt that they already sufficiently address the “symptom-like” topics of the PRAQ (sleepiness, problems at night) in their usual care, in the context of setting a diagnosis. The topics of the PRAQ that are not necessary for setting a diagnosis, but could potentially be used to motivate patients for their treatment, were not seen as essential to discuss by many professionals. The limited perceived benefit of the PRAQ is likely also mitigated by the fact that many steps of the care process have to be covered during the intake consultation, including discussing the sleep study results and choosing a treatment. This leaves little extra time to discuss a patient’s quality of life and detailed treatment goals. Furthermore, burden of disease plays a limited role in setting a diagnosis when  $AHI \geq 15$ , due to views on strict medical necessity of treatment, but also due to the driving ban for untreated patients. Therefore, adding the PRAQ to the current practice for OSA does not appear to be a sufficient trigger to increase attention to quality of life issues.

Patients generally held a more positive view towards the usefulness of the PRAQ. From the interviews it became clear that completing the PRAQ has the potential to give patients more insight into their OSA-related health complaints and encourages communication between family members. Furthermore, the patient survey results indicated that patients thought the PRAQ-report was useful for their preparation for the consultation and (when it was used by the healthcare professional) during the consultation.

Agreement to the patient survey statement “I feel like my treatment is worth it for me” was significantly lower on the post-implementation survey, while (also post-implementation) the reported severity of health complaints for which they attended the consultation was significantly higher. Potentially, patients are more



1  
2 aware of which remaining symptoms they still experience because of completing the PRAQ, and therefore have  
3 higher scores on the reported severity and a more negative view of their treatment. However, the differences in  
4 agreement scores was small, and both pre-and post-implementation of the PRAQ patients were very positive  
5 about their treatment.  
6  
7

8         There appears to be room for improvement of communication around the PRAQ, as there was confusion  
9 for some patients around the necessity of still discussing symptoms during the consultation. It may be beneficial  
10 to communicate the purpose of the PRAQ more clearly in the invitation email, and/or to instruct professionals to,  
11 at the beginning of their consultation, mention the PRAQ to patients and how its results will be addressed. More  
12 in-depth discussion with the field about what is most suitable or desirable in this context is needed.  
13  
14  
15

16 In the past few years, several similar initiatives involving PROMs have been introduced in The Netherlands,  
17 such as the Assessment of Burden of COPD (ABC) tool(34), the Nijmegen Clinical Screening Instrument for  
18 COPD(35), the QLIC-ON PROfile for children(36), and MyIBDcoach for patients with inflammatory bowel  
19 disease(37). Studies into these applications show promising results regarding their benefits (37, 38) despite some  
20 resistance from professionals who do not believe in the added benefit or believe the tool would be more useful  
21 for different professionals within the care pathway (39, 40). However, the healthcare professionals' skepticism  
22 about the potential benefits of the PRAQ seems to be more extensive. Potentially, professionals will see greater  
23 benefit of the PRAQ in the context of the recently released new guidelines for OSA (30) with their greater  
24 emphasis on (improving) burden of disease, which were not yet available at the time of this study. However, the  
25 question remains whether a more "holistic" approach to caring for OSA patients fits within the current setting of  
26 relatively short intake consultations which take place after the patients' diagnostic sleep study. It may be  
27 necessary to move towards a reorganization of care: for example to plan the intake consultations before the sleep  
28 study to allow for more focus on the individual patients' symptoms and problems, and to specifically evaluate  
29 the necessity of doing a diagnostic sleep study. Additionally, integrating the PRAQ in the electronic health  
30 record will help professionals fit the PRAQ-report better into their workflow.  
31  
32  
33  
34  
35  
36  
37

### 38 Strengths and limitations of the study

39 The major strength of this study is that we used mixed methods, which provides insight into the reasons why the  
40 PRAQ does not work as intended. Many other studies on PROMs study only *whether* a PROM works, rather  
41 than why or how.  
42

43         There are also limitations to the study. First, the survey used for this study was maybe not  
44 discriminative enough to show differences between the groups pre- and post-implantation of the PRAQ.  
45 Potentially, patients who have not completed the PRAQ do not know that, for example, their preparation for the  
46 consultation could maybe have been better than it currently was. Second, patient records were only studied in  
47 one of the included sleep centers. However, considering the information we collected in the interviews, we do  
48 not expect that we would have found different results in either of the other two sleep centers. Third, though  
49 technically there was enough time in this pilot for professionals to also use the PRAQ during the first follow-up  
50 consultation, practical implementation issues as well as a lack of initiative from healthcare professionals to  
51 actively check whether a follow-up PRAQ was available meant that it was not used often at this time point.  
52 Therefore we did not gain much insight into the potential use of the PRAQ for follow-up consultations. Lastly,  
53  
54  
55  
56  
57  
58  
59



1  
2 relatively few patients completed the survey items about the usefulness of the PRAQ, leaving room for potential  
3 bias (i.e. patients who have a more positive opinion may be more likely to complete these items).  
4  
5

#### 6 Conclusions

7  
8 Using the PRAQ in the daily clinical practice of OSA is viewed as useful by patients, but the enthusiasm of  
9 healthcare professionals differed per individual and was generally not very great. Implementation of the PRAQ  
10 does not seem a sufficient trigger to focus more attention to quality of life during consultations, and in current  
11 practice does not show impact on treatment choice or CPAP compliance. However, new Dutch guidelines for  
12 OSA care that have recently been published may lead to a greater emphasis on quality of life for patients,  
13 making the integration of the PRAQ in clinical care potentially more useful.  
14  
15

#### 16 Additional information:

17  
18  
19  
20 Funding: The first author was funded by the Radboudumc grant number R0002257. The funding organization  
21 had no role in the design, implementation, interpretation, or reporting of this study.  
22  
23

24 Conflicts of interest: All authors declare that they have no competing interests.  
25

26 Author contributions: All authors were involved in the conception and design. IA and MN conducted and  
27 analysed the interviews. IA collected and analysed the quantitative data. IA and PW interpreted the quantitative  
28 data. IA drafted the manuscript. All authors critically revised the manuscript for important intellectual content.  
29  
30

31 Data sharing statement: Data is available from the corresponding author upon reasonable request.  
32  
33

34 Ethics approval: Ethical approval is not required for this type of study under Dutch law, and an exemption was  
35 obtained by the local Medical Ethics Committee "CMO Regio Arnhem-Nijmegen".  
36  
37  
38  
39  
40  
41  
42  
43  
44  
45  
46  
47  
48  
49  
50  
51  
52  
53  
54  
55  
56  
57  
58  
59  
60

## References

1. Valderas JM, Alonso J, Guyatt GH. Measuring patient-reported outcomes: moving from clinical trials into clinical practice. *The Medical journal of Australia*. 2008;189(2):93-4.
2. Fleischmann M, Vaughan B. The challenges and opportunities of using patient reported outcome measures (PROMs) in clinical practice. *Int J Osteopath Med*. 2018:1-6.
3. Howell D, Molloy S, Wilkinson K, Green E, Orchard K, Wang K, et al. Patient-reported outcomes in routine cancer clinical practice: a scoping review of use, impact on health outcomes, and implementation factors. *Ann Oncol*. 2015;26(9):1846-58.
4. Greenhalgh J, Dalkin S, Gooding K, Gibbons E, Wright J, Meads D, et al. Functionality and feedback: a realist synthesis of the collation, interpretation and utilisation of patient-reported outcome measures data to improve patient care. *Health Services and Delivery Research*. Southampton (UK)2017.
5. Van Der Wees PJ, Nijhuis-Van Der Sanden MW, Ayanian JZ, Black N, Westert GP, Schneider EC. Integrating the use of patient-reported outcomes for both clinical practice and performance measurement: views of experts from 3 countries. *The Milbank quarterly*. 2014;92(4):754-75.
6. Valderas JM, Kotzeva A, Espallargues M, Guyatt G, Ferrans CE, Halyard MY, et al. The impact of measuring patient-reported outcomes in clinical practice: a systematic review of the literature. *Quality of life research : an international journal of quality of life aspects of treatment, care and rehabilitation*. 2008;17(2):179-93.
7. Boyce MB, Browne JP. Does providing feedback on patient-reported outcomes to healthcare professionals result in better outcomes for patients? A systematic review. *Quality of life research : an international journal of quality of life aspects of treatment, care and rehabilitation*. 2013;22(9):2265-78.
8. Holmes MM, Lewith G, Newell D, Field J, Bishop FL. The impact of patient-reported outcome measures in clinical practice for pain: a systematic review. *Quality of life research : an international journal of quality of life aspects of treatment, care and rehabilitation*. 2017;26(2):245-57.
9. Greenhalgh J, Dalkin S, Gibbons E, Wright J, Valderas JM, Meads D, et al. How do aggregated patient-reported outcome measures data stimulate health care improvement? A realist synthesis. *J Health Serv Res Policy*. 2018;23(1):57-65.
10. Bjornsdottir E, Benediktssdottir B, Pack AI, Arnardottir ES, Kuna ST, Gislason T, et al. The Prevalence of Depression among Untreated Obstructive Sleep Apnea Patients Using a Standardized Psychiatric Interview. *Journal of clinical sleep medicine : JCSM : official publication of the American Academy of Sleep Medicine*. 2016;12(1):105-12.
11. O'Donoghue N, McKay E. Exploring the impact of sleep apnoea on daily life and occupational engagement. *Br J Occup Ther*. 2012;75(11):609-516.
12. Reishtein JL, Pack AI, Maislin G, Dinges DF, Bloxham TJ, George CF, et al. Sleepiness and relationships in obstructive sleep apnea. *Issues Ment Health Nurs*. 2006;27(3):319-30.
13. Bradley TD, Floras JS. Obstructive sleep apnoea and its cardiovascular consequences. *Lancet*. 2009;373(9657):82-93.
14. Chan AS, Phillips CL, Cistulli PA. Obstructive sleep apnoea--an update. *Intern Med J*. 2010;40(2):102-6.
15. Young T, Peppard PE, Gottlieb DJ. Epidemiology of obstructive sleep apnea: a population health perspective. *Am J Respir Crit Care Med*. 2002;165(9):1217-39.
16. Senaratna CV, Perret JL, Lodge CJ, Lowe AJ, Campbell BE, Matheson MC, et al. Prevalence of obstructive sleep apnea in the general population: A systematic review. *Sleep Med Rev*. 2017;34:70-81.
17. Medicine AAoS. International Classification of Sleep Disorders. Diagnostic and Coding Manual. . In: Medicine AAoS, editor. 3rd edition ed2014.
18. Committee DCS. International Classification of Sleep Disorders: Diagnostic and Coding Manual. In: Association ASD, editor. Rochester1990.

19. Macey PM, Woo MA, Kumar R, Cross RL, Harper RM. Relationship between obstructive sleep apnea severity and sleep, depression and anxiety symptoms in newly-diagnosed patients. *PLoS One*. 2010;5(4):e10211.
20. Tam S, Woodson BT, Rotenberg B. Outcome measurements in obstructive sleep apnea: beyond the apnea-hypopnea index. *Laryngoscope*. 2014;124(1):337-43.
21. Kingshott RN, Engleman HM, Deary IJ, Douglas NJ. Does arousal frequency predict daytime function? *The European respiratory journal*. 1998;12(6):1264-70.
22. Turnbull CD, Stradling JR. To screen or not to screen for obstructive sleep apnea, that is the question. *Sleep Med Rev*. 2017;36:125-7.
23. Van Dongen HP, Baynard MD, Maislin G, Dinges DF. Systematic interindividual differences in neurobehavioral impairment from sleep loss: evidence of trait-like differential vulnerability. *Sleep*. 2004;27(3):423-33.
24. Abuzaid AS, Al Ashry HS, Elbadawi A, Ld H, Saad M, Elgendy IY, et al. Meta-Analysis of Cardiovascular Outcomes With Continuous Positive Airway Pressure Therapy in Patients With Obstructive Sleep Apnea. *Am J Cardiol*. 2017;120(4):693-9.
25. Yu J, Zhou Z, McEvoy RD, Anderson CS, Rodgers A, Perkovic V, et al. Association of Positive Airway Pressure With Cardiovascular Events and Death in Adults With Sleep Apnea: A Systematic Review and Meta-analysis. *JAMA*. 2017;318(2):156-66.
26. Marin JM, Agusti A, Villar I, Forner M, Nieto D, Carrizo SJ, et al. Association between treated and untreated obstructive sleep apnea and risk of hypertension. *JAMA*. 2012;307(20):2169-76.
27. Barbe F, Duran-Cantolla J, Sanchez-de-la-Torre M, Martinez-Alonso M, Carmona C, Barcelo A, et al. Effect of continuous positive airway pressure on the incidence of hypertension and cardiovascular events in nonsleepy patients with obstructive sleep apnea: a randomized controlled trial. *JAMA*. 2012;307(20):2161-8.
28. McNicholas WT. Diagnostic criteria for obstructive sleep apnea: time for reappraisal. *J Thorac Dis*. 2018;10(1):531-3.
29. McNicholas WT, Bassetti CL, Ferini-Strambi L, Pepin JL, Pevernagie D, Verbraecken J, et al. Challenges in obstructive sleep apnoea. *Lancet Respir Med*. 2018;6(3):170-2.
30. NVALT. Richtlijn diagnostiek en behandeling van obstructief slaapapneu (OSA) bij volwassenen. Richtlijndatabase.nl: Nederlandse Vereniging van Artsen voor Longziekten en Tuberculose; 2017.
31. Abma IL, Rovers M, IJff M, Hol B, Westert GP, Van der Wees PJ. The development of a patient-reported outcome measure for patients with obstructive sleep apnea: the Patient-Reported Apnea Questionnaire (PRAQ). *Journal of Patient-Reported Outcomes*. 2017;1(14).
32. Abma IL, Rovers M, M IJ, Hol B, Westert GP, van der Wees PJ. Instrument completion and validation of the patient-reported apnea questionnaire (PRAQ). *Health Qual Life Outcomes*. 2018;16(1):158.
33. Grunstein RR. Sleep-related breathing disorders. 5. Nasal continuous positive airway pressure treatment for obstructive sleep apnoea. *Thorax*. 1995;50(10):1106-13.
34. Slok AH, in 't Veen JC, Chavannes NH, van der Molen T, Rutten-van Molken MP, Kerstjens HA, et al. Development of the Assessment of Burden of COPD tool: an integrated tool to measure the burden of COPD. *NPJ Prim Care Respir Med*. 2014;24:14021.
35. Peters JB, Daudey L, Heijdra YF, Molema J, Dekhuijzen PN, Vercoulen JH. Development of a battery of instruments for detailed measurement of health status in patients with COPD in routine care: the Nijmegen Clinical Screening Instrument. *Quality of life research : an international journal of quality of life aspects of treatment, care and rehabilitation*. 2009;18(7):901-12.
36. Engelen V, Haverman L, Koopman H, Schouten-van Meeteren N, Meijer-van den Bergh E, Vrijmoet-Wiersma J, et al. Development and implementation of a patient reported outcome intervention (QLIC-ON PROfile) in clinical paediatric oncology practice. *Patient Educ Couns*. 2010;81(2):235-44.
37. de Jong MJ, van der Meulen-de Jong AE, Romberg-Camps MJ, Becx MC, Maljaars JP, Cilissen M, et al. Telemedicine for management of inflammatory bowel disease (myIBDcoach): a pragmatic, multicentre, randomised controlled trial. *Lancet*. 2017;390(10098):959-68.
38. Slok AH, Kotz D, van Breukelen G, Chavannes NH, Rutten-van Molken MP, Kerstjens HA, et al. Effectiveness of the Assessment of Burden of COPD (ABC) tool on health-related quality of life in

1  
2  
3 patients with COPD: a cluster randomised controlled trial in primary and hospital care. *BMJ Open*.  
4 2016;6(7):e011519.

5 39. Schepers SA, Sint Nicolaas SM, Haverman L, Wensing M, Schouten van Meeteren AYN,  
6 Veening MA, et al. Real-world implementation of electronic patient-reported outcomes in outpatient  
7 pediatric cancer care. *Psychooncology*. 2017;26(7):951-9.

8 40. Slok AH, Twellaar M, Jutbo L, Kotz D, Chavannes NH, Holverda S, et al. 'To use or not to  
9 use': a qualitative study to evaluate experiences of healthcare providers and patients with the  
10 assessment of burden of COPD (ABC) tool. *NPJ Prim Care Respir Med*. 2016;26:16074.

11  
12  
13  
14  
15  
16  
17  
18  
19  
20  
21  
22  
23  
24  
25  
26  
27  
28  
29  
30  
31  
32  
33  
34  
35  
36  
37  
38  
39  
40  
41  
42  
43  
44  
45  
46  
47  
48  
49  
50  
51  
52  
53  
54  
55  
56  
57  
58  
59  
60

For peer review only

### Supplementary file 1: the PRAQ-report and its implementation in clinical practice

In the PRAQ-report, the results of each of the ten PRAQ-domains are shown in the form of a colored smiley, ranging from green (patient indicated very few problems) to dark red (patient indicated a lot of problems). Domain scores over time and individual item scores are shown on subsequent pages of the PRAQ-report. The included domains were: symptoms at night, sleepiness, tiredness, daily activities, unsafe situations, memory and concentration, quality of sleep, emotions, social activities, and health concerns. The PRAQ also contains a set of “intake questions” that were designed together with the participating centers and aimed to replace the diagnostic intake questionnaires that the centers usually distribute to all their new patients. This involved more factual, broader questions to help professionals in setting a correct diagnosis.

The PRAQ was distributed via a secure online platform (VitalHealth QuestManager) which sent out email invitations to a patient to complete the PRAQ at ten and (if the PRAQ was not yet completed) three days before the patient’s consultation. After completion of the PRAQ, patients and healthcare professionals both had the ability to access the PRAQ-report directly from the online platform.

Individual implementation plans for collecting email addresses of patients, creating patient accounts, and entering consultation dates were developed for each study center to optimally fit their usual work flow.

Healthcare professionals received information about the content of the PRAQ and PRAQ-report, and instructions and a short training in how to use QuestManager. They were then encouraged to integrate the PRAQ into their own workflow in whichever way each individual professional found most convenient. After approximately two months of using the PRAQ, the researchers organized a meeting in each sleep centre in which the healthcare professionals were invited to discuss how they were using the PRAQ-report in their practice, in order to exchange ideas and potentially adjust their way of using the PRAQ.

# Reporting checklist for quality improvement study.

Based on the SQUIRE guidelines.

## Instructions to authors

Complete this checklist by entering the page numbers from your manuscript where readers will find each of the items listed below.

Your article may not currently address all the items on the checklist. Please modify your text to include the missing information. If you are certain that an item does not apply, please write "n/a" and provide a short explanation.

Upload your completed checklist as an extra file when you submit to a journal.

In your methods section, say that you used the SQUIRE reporting guidelines, and cite them as:

Ogrinc G, Davies L, Goodman D, Batalden P, Davidoff F, Stevens D. SQUIRE 2.0 (Standards for QUality Improvement Reporting Excellence): revised publication guidelines from a detailed consensus process

|                     | Reporting Item                                                                                                                                                                                                                      | Page Number |
|---------------------|-------------------------------------------------------------------------------------------------------------------------------------------------------------------------------------------------------------------------------------|-------------|
|                     | #1 Indicate that the manuscript concerns an initiative to improve healthcare (broadly defined to include the quality, safety, effectiveness, patientcenteredness, timeliness, cost, efficiency, and equity of healthcare)           | 3           |
|                     | #02a Provide adequate information to aid in searching and indexing                                                                                                                                                                  | 2           |
|                     | #02b Summarize all key information from various sections of the text using the abstract format of the intended publication or a structured summary such as: background, local problem, methods, interventions, results, conclusions | 2           |
| Problem description | #3 Nature and significance of the local problem                                                                                                                                                                                     | 3           |
| Available knowledge | #4 Summary of what is currently known about the problem, including relevant previous studies                                                                                                                                        | 3           |
| Rationale           | #5 Informal or formal frameworks, models, concepts, and / or                                                                                                                                                                        | 3           |

|    |                              |                                                                                                                                                                                             |                             |
|----|------------------------------|---------------------------------------------------------------------------------------------------------------------------------------------------------------------------------------------|-----------------------------|
|    |                              | theories used to explain the problem, any reasons or assumptions that were used to develop the intervention(s), and reasons why the intervention(s) was expected to work                    |                             |
| 1  |                              |                                                                                                                                                                                             |                             |
| 2  |                              |                                                                                                                                                                                             |                             |
| 3  |                              |                                                                                                                                                                                             |                             |
| 4  |                              |                                                                                                                                                                                             |                             |
| 5  | Specific aims                | #6 Purpose of the project and of this report                                                                                                                                                | 3, 4                        |
| 6  |                              |                                                                                                                                                                                             |                             |
| 7  | Context                      | #7 Contextual elements considered important at the outset of introducing the intervention(s)                                                                                                | 4                           |
| 8  |                              |                                                                                                                                                                                             |                             |
| 9  |                              |                                                                                                                                                                                             |                             |
| 10 |                              |                                                                                                                                                                                             |                             |
| 11 | Intervention(s)              | #08a Description of the intervention(s) in sufficient detail that others could reproduce it                                                                                                 | 4                           |
| 12 |                              |                                                                                                                                                                                             |                             |
| 13 |                              |                                                                                                                                                                                             |                             |
| 14 |                              |                                                                                                                                                                                             |                             |
| 15 |                              | #08b Specifics of the team involved in the work                                                                                                                                             | 5, 6                        |
| 16 |                              |                                                                                                                                                                                             |                             |
| 17 | Study of the Intervention(s) | #09a Approach chosen for assessing the impact of the intervention(s)                                                                                                                        | 5, 6                        |
| 18 |                              |                                                                                                                                                                                             |                             |
| 19 |                              |                                                                                                                                                                                             |                             |
| 20 |                              |                                                                                                                                                                                             |                             |
| 21 |                              |                                                                                                                                                                                             |                             |
| 22 |                              | #09b Approach used to establish whether the observed outcomes were due to the intervention(s)                                                                                               | 5                           |
| 23 |                              |                                                                                                                                                                                             |                             |
| 24 |                              |                                                                                                                                                                                             |                             |
| 25 | Measures                     | #10a Measures chosen for studying processes and outcomes of the intervention(s), including rationale for choosing them, their operational definitions, and their validity and reliability   | 5, 6                        |
| 26 |                              |                                                                                                                                                                                             |                             |
| 27 |                              |                                                                                                                                                                                             |                             |
| 28 |                              |                                                                                                                                                                                             |                             |
| 29 |                              |                                                                                                                                                                                             |                             |
| 30 |                              |                                                                                                                                                                                             |                             |
| 31 |                              | #10b Description of the approach to the ongoing assessment of contextual elements that contributed to the success, failure, efficiency, and cost                                            | 5                           |
| 32 |                              |                                                                                                                                                                                             |                             |
| 33 |                              |                                                                                                                                                                                             |                             |
| 34 |                              |                                                                                                                                                                                             |                             |
| 35 |                              |                                                                                                                                                                                             |                             |
| 36 |                              | #10c Methods employed for assessing completeness and accuracy of data                                                                                                                       | N/A, this was a pilot study |
| 37 |                              |                                                                                                                                                                                             |                             |
| 38 |                              |                                                                                                                                                                                             |                             |
| 39 |                              |                                                                                                                                                                                             |                             |
| 40 |                              |                                                                                                                                                                                             |                             |
| 41 | Analysis                     | #11a Qualitative and quantitative methods used to draw inferences from the data                                                                                                             | 5, 6                        |
| 42 |                              |                                                                                                                                                                                             |                             |
| 43 |                              |                                                                                                                                                                                             |                             |
| 44 |                              |                                                                                                                                                                                             |                             |
| 45 |                              | #11b Methods for understanding variation within the data, including the effects of time as a variable                                                                                       | N/A, this was a pilot study |
| 46 |                              |                                                                                                                                                                                             |                             |
| 47 |                              |                                                                                                                                                                                             |                             |
| 48 |                              |                                                                                                                                                                                             |                             |
| 49 |                              |                                                                                                                                                                                             |                             |
| 50 | Ethical considerations       | #12 Ethical aspects of implementing and studying the intervention(s) and how they were addressed, including, but not limited to, formal ethics review and potential conflict(s) of interest | 15                          |
| 51 |                              |                                                                                                                                                                                             |                             |
| 52 |                              |                                                                                                                                                                                             |                             |
| 53 |                              |                                                                                                                                                                                             |                             |
| 54 |                              |                                                                                                                                                                                             |                             |
| 55 |                              |                                                                                                                                                                                             |                             |
| 56 |                              |                                                                                                                                                                                             |                             |
| 57 |                              | #13a Initial steps of the intervention(s) and their evolution over                                                                                                                          | N/A, data                   |
| 58 |                              |                                                                                                                                                                                             |                             |
| 59 |                              |                                                                                                                                                                                             |                             |
| 60 |                              |                                                                                                                                                                                             |                             |



|                |                                                                                                                                                   |                             |
|----------------|---------------------------------------------------------------------------------------------------------------------------------------------------|-----------------------------|
|                | time (e.g., time-line diagram, flow chart, or table), including modifications made to the intervention during the project                         | not available               |
|                | #13b Details of the process measures and outcome                                                                                                  | 6-13                        |
|                | #13c Contextual elements that interacted with the intervention(s)                                                                                 | 6-9                         |
|                | #13d Observed associations between outcomes, interventions, and relevant contextual elements                                                      | 6-13                        |
|                | #13e Unintended consequences such as unexpected benefits, problems, failures, or costs associated with the intervention(s).                       | 7                           |
|                | #13f Details about missing data                                                                                                                   | 12                          |
| Summary        | #14a Key findings, including relevance to the rationale and specific aims                                                                         | 13                          |
|                | #14b Particular strengths of the project                                                                                                          | 14                          |
| Interpretation | #15a Nature of the association between the intervention(s) and the outcomes                                                                       | 13                          |
|                | #15b Comparison of results with findings from other publications                                                                                  | 14                          |
|                | #15c Impact of the project on people and systems                                                                                                  | 13, 14                      |
|                | #15d Reasons for any differences between observed and anticipated outcomes, including the influence of context                                    | 13, 14                      |
|                | #15e Costs and strategic trade-offs, including opportunity costs                                                                                  | N/A, no costs studied       |
| Limitations    | #16a Limits to the generalizability of the work                                                                                                   | N/A                         |
|                | #16b Factors that might have limited internal validity such as confounding, bias, or imprecision in the design, methods, measurement, or analysis | 14                          |
|                | #16c Efforts made to minimize and adjust for limitations                                                                                          | N/A, this was a pilot study |
| Conclusion     | #17a Usefulness of the work                                                                                                                       | 15                          |



|    |         |                                                                   |              |
|----|---------|-------------------------------------------------------------------|--------------|
| 1  |         | #17b Sustainability                                               | N/A, results |
| 2  |         |                                                                   | were         |
| 3  |         |                                                                   | negative     |
| 4  |         |                                                                   |              |
| 5  |         |                                                                   |              |
| 6  |         | #17c Potential for spread to other contexts                       | N/A results  |
| 7  |         |                                                                   | were         |
| 8  |         |                                                                   | negative     |
| 9  |         |                                                                   |              |
| 10 |         |                                                                   |              |
| 11 |         | #17d Implications for practice and for further study in the field | 15           |
| 12 |         |                                                                   |              |
| 13 |         | #17e Suggested next steps                                         | N/A, results |
| 14 |         |                                                                   | were         |
| 15 |         |                                                                   | negative     |
| 16 |         |                                                                   |              |
| 17 |         |                                                                   |              |
| 18 |         |                                                                   |              |
| 19 | Funding | #18 Sources of funding that supported this work. Role, if any, of | 15           |
| 20 |         | the funding organization in the design, implementation,           |              |
| 21 |         | interpretation, and reporting                                     |              |
| 22 |         |                                                                   |              |
| 23 |         |                                                                   |              |

24 The SQUIRE 2.0 checklist is distributed under the terms of the Creative Commons Attribution License  
 25 CC BY-NC 4.0. This checklist was completed on 10. August 2018 using <http://www.goodreports.org/>,  
 26 a tool made by the [EQUATOR Network](#) in collaboration with [Penelope.ai](#)  
 27  
 28  
 29  
 30  
 31  
 32  
 33  
 34  
 35  
 36  
 37  
 38  
 39  
 40  
 41  
 42  
 43  
 44  
 45  
 46  
 47  
 48  
 49  
 50  
 51  
 52  
 53  
 54  
 55  
 56  
 57  
 58  
 59  
 60

# BMJ Open

## Does the Patient-Reported Apnea Questionnaire (PRAQ) increase patient-centeredness in the daily practice of sleep centers? A mixed-methods study.

|                                 |                                                                                                                                                                                                                                                                                                                                    |
|---------------------------------|------------------------------------------------------------------------------------------------------------------------------------------------------------------------------------------------------------------------------------------------------------------------------------------------------------------------------------|
| Journal:                        | <i>BMJ Open</i>                                                                                                                                                                                                                                                                                                                    |
| Manuscript ID                   | bmjopen-2018-025963.R1                                                                                                                                                                                                                                                                                                             |
| Article Type:                   | Research                                                                                                                                                                                                                                                                                                                           |
| Date Submitted by the Author:   | 13-Mar-2019                                                                                                                                                                                                                                                                                                                        |
| Complete List of Authors:       | Abma, Inger; Radboudumc, IQ healthcare Rovers, Maroeska; Radboudumc, Health Evidence and Operating Rooms IJff, Marijke; ApneuVereniging Hol, Bernard; Albert Schweitzer Ziekenhuis, Sleep centre Nägele, Masha; Radboudumc, IQ healthcare Westert, Gert; Radboudumc, IQ healthcare Van der Wees, Philip; Radboudumc, IQ healthcare |
| <b>Primary Subject Heading</b>: | Patient-centred medicine                                                                                                                                                                                                                                                                                                           |
| Secondary Subject Heading:      | Communication, Qualitative research                                                                                                                                                                                                                                                                                                |
| Keywords:                       | SLEEP MEDICINE, patient-reported outcome measure, obstructive sleep apnea, quality of life, Quality in health care < HEALTH SERVICES ADMINISTRATION & MANAGEMENT                                                                                                                                                                   |
|                                 |                                                                                                                                                                                                                                                                                                                                    |

SCHOLARONE™  
Manuscripts

1  
2  
3 **Does the Patient-Reported Apnea Questionnaire (PRAQ) increase patient-centeredness in the daily**  
4 **practice of sleep centers? A mixed-methods study.**  
5  
6

7 Inger L. Abma, MSc<sup>1</sup>, Prof. Maroeska Rovers<sup>2</sup>, Marijke IJff<sup>3</sup>, Bernard Hol, MD<sup>4</sup>, Masha E. Nägele<sup>1</sup>, BSc, Prof.  
8 Gert P. Westert<sup>1</sup>, Prof. Philip J. van der Wees<sup>1</sup>  
9  
10

11  
12  
13  
14  
15  
16 <sup>1</sup> Radboud University Medical Center, Radboud Institute of Health Sciences, IQ healthcare, Nijmegen, the  
17 Netherlands

18  
19 <sup>2</sup> Radboud University Medical Center, Radboud Institute of Health Sciences, Departments for Health Evidence  
20 and Operating Rooms, Nijmegen, The Netherlands

21  
22 <sup>3</sup> ApneuVereniging, Doorn, The Netherlands

23  
24 <sup>4</sup> Albert Schweitzer Ziekenhuis, Sleep Center, Dordrecht, The Netherlands  
25  
26  
27  
28  
29  
30

31 Corresponding author:

32 I.L. Abma

33 e-mail: [Inger.abma@radboudumc.nl](mailto:Inger.abma@radboudumc.nl)

34  
35 tel: +31 24 3616359  
36  
37

38 Address:

39 Radboud University Medical Center

40 IQ healthcare

41 PO box 9101, huispost 114

42  
43 6500 HB, Nijmegen  
44  
45  
46  
47

48 ORCID iDs

49 I. Abma: 0000-0002-3307-6736

50 M. Rovers: 0000-0002-3095-170X

51 G. Westert: 0000-0003-3744-8207

52 P. van der Wees: 0000-0003-2881-5159  
53  
54  
55

56 Word count: 5218  
57  
58  
59

60 Keywords: Obstructive sleep apnea, quality of life, patient-reported outcome measure, patient-centeredness

## Abstract

**Objectives:** The objective of this exploratory study was to see how the Patient-Reported Apnea Questionnaire (PRAQ) may impact the daily clinical practice of sleep centers, and why it may or may not work as expected. The hypotheses were tested that this patient-reported outcome measure (PROM) makes patients more aware of which of their health complaints may be related to obstructive sleep apnea (OSA), and that it improves patient-centeredness of care by shifting the focus of care away from (only) medical problems towards the individual burden of disease and quality of life.

**Design:** Mixed methods. The quantitative study (surveys, patient records) was a before-and-after study.

**Setting:** Three sleep centres in The Netherlands (secondary care).

**Participants:** 27 patients and 14 healthcare professionals were interviewed. 487 patients completed surveys pre-implementation, and 377 patients completed surveys post-implementation of the PRAQ. For the health records, 125 patients were included in the pre-implementation group, and 124 other patients in the post-implementation group.

**Interventions:** The PRAQ was used in clinical practice for six successive months.

**Outcome measures:** Scores on individual survey items, number of patients receiving non-medical treatment, adjustment of treatment at first follow-up, compliance with treatment.

**Results:** Patients were generally positive about the usefulness of the PRAQ before and during the consultation, as they felt more informed. Healthcare providers did not consider the PRAQ very useful, and they reported minor impact on their consultations. The surveys and health record study did not show an impact of the PRAQ on clinical practice.

**Conclusions:** Implementing the PRAQ may be beneficial to patients, but this study does not show much impact with regard to patient-centeredness of care. New Dutch guidelines for OSA care may lead to a greater emphasis on quality of life and value of care for patients, making its integration in clinical care potentially more useful.

## Article summary

### Strengths and limitations of this study

- The mixed methods approach of this exploratory study is its major strength: the study provides insight into the reasons why the PRAQ does not work as intended
- The patient survey may not have been discriminative enough to show differences between the groups pre- and post-implantation of the PRAQ
- Electronic health records were only studied in one of the included sleep centers – however taking into account the interview results we do not expect different results in the other centers
- The PRAQ was in practice not used for follow-up consultations as often as intended, making evaluation of its use in this setting less robust

## 1. Introduction

The integration of patient-reported outcome measures (PROMs) in clinical practice has been gaining popularity in the past decade (1-3). PROM data collected in clinical practice can be aggregated and used for quality improvement purposes, or individual scores can be used in daily clinical practice to improve patient care. In this latter function PROMs can be used in different ways, e.g. as a screening tool, a monitoring or evaluation tool, a tool to inform and empower patients, and/or to increase the patient-centeredness of care by shifting the focus of care away from (only) medical problems towards the problems patients experience in their daily life (4). When using PROMs in daily clinical practice, it may be sensible to combine the use of a PROM on an individual patient level with application on an aggregate level (5). There have been a number of studies that aimed to evaluate the usefulness of PROMs in clinical practice in a variety of settings, of which the results are mixed (6-8). Though qualitative research on this topic has been synthesized in a recent review (4, 9) including a list of hypotheses on how PROMs might work, there are still many questions regarding which PROMs can be potentially useful in which settings.

This study is focused on the application of individual PROM scores in sleep centers which diagnose and treat patients with obstructive sleep apnea (OSA), a condition for which a PROM could be a useful tool to improve patient-centeredness of care. OSA is a highly prevalent but often unrecognized condition in which frequent collapse of the upper airway causes breathing stops while asleep. The subsequent arousals can result in severe sleepiness and fatigue during the day, often affecting a patient's cognitive function, psychological well-being, relationships, and ability to work (10-12). OSA has also been shown to be an independent risk factor for hypertension, heart failure and diabetes (13-15). The prevalence of OSA has been reported to be 6% to 38%, depending on the exact definition of OSA and the population studied, and is higher in men (16).

Severity of OSA and necessity for treatment has historically been based on the number of (partial) breathing stops per hour: the apnea-hypopnea index (AHI)(17, 18). However, there is no linear association between AHI and severity of symptoms or the presence of comorbidities (19-23). There is also little evidence that treating patients with mild OSA (based on AHI) or patients with low sleepiness is useful in preventing cardiovascular disease or incidents (24-27). In the past few years there has therefore been international discussion regarding new approaches to diagnose "clinically relevant" OSA (28, 29). This discussion has also made its way into recent Dutch guidelines for OSA, in which it is recommended that there should be a greater focus on the presence of potentially related comorbidities, as well as the experienced burden of disease for individual patients. The goal of treatment is the improvement of these aspects of OSA (30).

We have developed and validated a PROM for use in clinical practice which may aid this new focus of care for patients with OSA: the Patient-Reported Apnea Questionnaire (PRAQ) (31, 32), which measures OSA-related quality of life. The goal of this PROM is to improve patient-centeredness of care on an individual level by shifting the conversation away from the medical problems and towards and individual's burden of disease/quality of life, and also to measure quality of care on an aggregate level. To develop the PRAQ, the input from patients and healthcare professionals was used to select the topics that were considered most important to discuss in clinical practice (31). The individual PRAQ scores of each patient with (suspected) OSA are captured in the 'PRAQ-report', which was designed together with patients and uses colored smileys to show the results for the 10 domains of the PRAQ. The advantage of the PRAQ compared to other commonly used PROMs in the

1  
2  
3 care for patients with OSA (such as the Epworth Sleepiness Scale (ESS), Functional Outcomes of Sleep  
4 Questionnaire (FOSQ), etc) is that it provides a comprehensive overview of the possibly impacted aspects of  
5 quality of life that patients with OSA may experience. It is therefore potentially suitable for shifting the focus of  
6 care away from (only) medical problems towards the problems patients experience in their daily life.  
7

8  
9 This explorative study aims to study the impact of the PRAQ and PRAQ-report on the clinical practice  
10 of OSA, and explore *why* the PRAQ did or did not have an impact. A combination of both qualitative and  
11 quantitative methods is used that will add to the general knowledge on the circumstances under which PROMs  
12 do or do not work in clinical practice.  
13  
14  
15  
16

## 17 **2. Methods**

18 This article describes an exploratory mixed methods study in which the PRAQ is implemented in the clinical  
19 practice of three sleep centers. Qualitative interviews and a patient survey were used to explore patients' and  
20 healthcare providers' experiences with the PRAQ, and to identify potential barriers and facilitators to its use.  
21 Additionally, data were collected from electronic health records to study whether the hypotheses about the  
22 potential impact of the PRAQ mentioned in the introduction are correct. For the patient survey and the patient  
23 record study we conducted a before-and-after study. The different methods are described in more detail in the  
24 next sections.  
25  
26  
27  
28  
29

### 30 *2.1 Hypotheses*

31 We have several hypotheses regarding how the PRAQ may influence patients and healthcare professionals, and  
32 how this could impact clinical practice. First of all, completing the PRAQ could:

- 33 • Encourage patients to consider which problems they experience that might be related to OSA and that  
34 they might want to discuss
- 35 • Aid healthcare professionals in opening a conversation about an individual patient's burden of disease  
36 (apnea-related quality of life)
- 37 • Aid healthcare professionals to evaluate treatment and identify problems that are still present  
38  
39  
40  
41  
42

43 We think that this may potentially lead to:

- 44 • Higher patient compliance with treatment
- 45 • More explicit choices regarding whether clinical treatment for OSA is (potentially) beneficial to the  
46 patient
- 47 • An increase in referrals to other healthcare providers, such as psychologists
- 48 • More 'holistic' care, in which there is increased attention for the well-being of patients, including the  
49 psychological and social effects of OSA and its comorbidities  
50  
51  
52  
53  
54

### 55 *2.2 The PRAQ and its implementation*

56 The PRAQ and its complementary PRAQ-report were designed with the input of patients with OSA and  
57 healthcare professionals (31). The questions of the PRAQ can be found in supplementary file 1. The PRAQ takes  
58  
59  
60

1  
2  
3 approximately 15 minutes to complete (31). More information about the PRAQ-report and how the PRAQ was  
4 implemented in clinical practice can be found in supplementary file 2.  
5  
6

### 7 *2.3 Setting and subjects*

8 Sleep centers of three Dutch hospitals took part in the study. The PRAQ was part of the clinical practice routine  
9 of these centers for six successive months. The PRAQ was distributed to patients attending an intake  
10 consultation for possible OSA (which takes place after a patient's diagnostic sleep study), and subsequently to  
11 the subselection of these intake patients diagnosed with OSA who returned for a follow-up consultation after  
12 starting treatment.  
13  
14  
15  
16

### 17 *2.4 Interviews*

18 In-depth, semi-structured interviews were conducted with patients and healthcare professionals in the last two  
19 months of the study. The interview guides contained broad, open questions as well as more specific questions  
20 informed by topics previously identified in the literature (4). For patients the main goal was to assess whether  
21 completing the PRAQ was acceptable to them, and to find out the impact that the PRAQ and PRAQ report had  
22 for them on the (preparation for) the consultation. For healthcare providers, questions were mostly focused on  
23 how they used the PRAQ and why they used it this way, and the impact the use of the PRAQ has on their  
24 practice. This information can provide the basis for interpreting the results of the electronic health record study.  
25  
26  
27  
28

29 Patients were invited via email by the sleep center before their scheduled consultation, or by their  
30 healthcare professional directly after their consultation (for more information see supplementary file 3). Only  
31 patients who had completed the PRAQ were invited. We interviewed 27 patients. Data saturation was reached.  
32 Characteristics of the interviewed patients and of the interviews can be found in table 1.  
33  
34

35 All healthcare professionals of the three participating sleep centers that had had the option to work with  
36 the PRAQ were invited to participate. This resulted in interviews with 14 healthcare professionals: six  
37 pulmonologists, six physician assistants (PAs) and two nurses. Two pulmonologists refused an interview because  
38 they had not seen many patients for OSA, two others because they had not used the PRAQ at all, and one PA  
39 refused for personal reasons. At least four healthcare professionals were interviewed at each of the three sleep  
40 centers.  
41  
42

43 More information on the (analysis of) the interviews can be found in supplementary file 3.  
44  
45  
46  
47  
48  
49  
50  
51  
52  
53  
54  
55  
56  
57  
58  
59  
60

Table 1. Characteristics of the interviewed patients and the interviews

| <b>Patient characteristics (n=27)</b>                                               |                      |
|-------------------------------------------------------------------------------------|----------------------|
| Age (mean, range)                                                                   | 59 (31-82)           |
| Gender (male)                                                                       | 18                   |
| Highest education level (range)                                                     | Primary school - PhD |
| <b>Interview characteristics (n=27)</b>                                             |                      |
| Interview after intake consultation (n)                                             | 18                   |
| Interview after follow-up consultation (n)                                          | 9                    |
| Interview together with partner or other relative that attended the consultation    | 4                    |
| Patients who had not seen the PRAQ-report at the time of the interview <sup>1</sup> | 5                    |

1. Viewing the PRAQ-report before the consultation was optional, and not all healthcare providers showed the report to the patient during the consultation

### 2.5 Surveys

The patient survey was designed for this study to study potential differences in patient empowerment and patient-centeredness of care before and after the implementation of the PRAQ. The items of the survey covered how prepared patients felt for their consultation, whether there was discussion of the health problems that patients consider relevant during the consultation, and whether patients were motivated to start their treatment. Patients could indicate their agreement on several statements on these topics with the statement on a 7-point Likert scale. The survey was checked by the members of the research team, which included a patient, but was not pilot tested. A translated version of the survey can be found in supplementary file 4.

Surveys were distributed by healthcare professionals to all of their patients attending either an intake or first follow-up consultation for (suspected) OSA. Distribution of the surveys took place in the two months before implementation of the intervention (control group), and in the last two months of the six months that the intervention was part of daily clinical practice (intervention group). For the intervention group, the survey also contained additional questions about the patient's opinion on the usefulness of the PRAQ. Participation was voluntary and anonymous.

### 2.6 Electronic health records

Electronic health records from one of the included sleep centers were studied to explore potential changes in treatment and compliance with treatment resulting from the use of the PRAQ. Data were collected from patients with an  $AHI \geq 5$  attending an intake consultation during the final two months of the study period and during the same time period the previous year. Information was collected about treatment choice at intake, treatment adaptations and compliance with treatment at the first follow-up consultation, and patient characteristics. Compliance data is only available for patients who receive Continuous Positive Airway Pressure (CPAP), the most commonly prescribed treatment for patients with OSA. As part of standard care, hours of use are registered by the CPAP device and entered into the health record at follow-up consultations. CPAP compliance is



1  
2  
3 expressed as average hrs CPAP use/night in the month before the follow-up consultation, with an average of 4  
4 hrs/night generally being the minimum to be considered compliant (33).

5  
6 No identifying information was collected from the health records. The data collection procedure  
7 guaranteed that the records would at all times remain anonymous to the researchers.  
8  
9

## 10 *2.7 Statistical analyses*

11 Mann-Whitney U tests were conducted for each of the survey items that patients were asked to complete both  
12 pre- and post-implementation of the PRAQ. For the electronic health record study, treatment choice at intake  
13 was studied by aggregating the choice into two variables: medical treatment of OSA (e.g. CPAP, MRA, referral  
14 for surgery) and no or non-medical treatment (e.g. lifestyle advice), as these are the variables which we  
15 potentially expected the PRAQ to influence. A Chi-Square test was used to test for statistical significance. For  
16 the follow-up variables of the patient record study, Chi-Square tests (for dichotomous variables) and an  
17 independent samples T-test (for CPAP compliance in minutes) were conducted.  
18  
19

20  
21 No correction for multiple testing was performed because this is an exploratory study. A p-value of  
22 <0.05 was therefore taken as a significant difference, which can be interpreted as an indication that this is a  
23 potentially interesting variable for a possible future study.  
24  
25  
26  
27

## 28 *2.8 Patient and Public Involvement*

29 A board member (author MI) of the Dutch patient organisation for OSA (Apneuvereniging) was involved with  
30 this study from its inception, including the research question and outcome measures and interpretation of the  
31 results. This author was also closely involved in the development of the intervention itself (the PRAQ and its  
32 complementary PRAQ-report), as were other members of the patient organization (31). They also approved of  
33 the burden and time required for the intervention. Patients were not involved in the recruitment for the study.  
34  
35  
36  
37  
38

## 39 **3. Results**

### 40 *3.1 Interviews*

#### 41 Patient perspective

42  
43 Patients were generally willing to complete the PRAQ before their consultation, and patient response as reported  
44 by the healthcare professionals was high. About half of the interviewed patients indicated that completing the  
45 PRAQ helped them prepare for their intake consultation by giving them more insight into their complaints and  
46 functioning and how this might relate to OSA, and/or made them consider what they wanted to discuss with the  
47 healthcare professional. Many patients completed the PRAQ with a family member which instigated discussions  
48 patients often considered useful. A great majority of interviewed patients indicated that they did not mind taking  
49 the time to complete the PRAQ, and many also considered the smileys of the PRAQ-report a clear and easy way  
50 of communicating the results. Box 1 contains quotes illustrating the statements in this paragraph.  
51  
52  
53  
54  
55

56 The interviews also revealed some unintended effects of the PRAQ. A majority of patients assumed that  
57 the main purpose of the PRAQ was to aid their healthcare professional in setting a diagnosis, by providing  
58 information about symptoms ahead of time. A few patients believed that discussion of patient complaints during  
59 the consultation was therefore no longer necessary after completing the PRAQ (box 2), while healthcare  
60

professionals consider this discussion very important (see next section). What may have played a role here is that several interviewed patients seemed eager to hear their sleep study results, rather than (first) spend much time talking about their symptoms or problems.

Additionally, there were some issues around the interpretation of the smileys in the PRAQ-report. Several of the interviewed patients did not seem to view the PRAQ-report as merely a visualization of the answers they had given, but rather as a ‘test result’. Some considered the number of ‘unhappy’ smileys as an indication of whether they were doing well or not, which made some patients reconsider the severity of their complaints (box 2).

Box 1:

“Look, it’s just very insightful. You can see instantly where the problems are and on this other [page] you can see what the improvements are. Yes, it’s kinda nice.” (Centre 3, patient 10)

“Yes, you know I do find it useful, because you have so many... so many things that bother you, that you forget what it is that bothers you. Or because it has become part of you, so to say. So yeah in order [not] to forget things, a questionnaire like this comes in handy.” (Centre 2, patient 1)

“But there were quite a lot of questions where I was like, oh, sometimes I’m like, how does that fit with [apnea]? But most did, but there were questions where I was like, is that related to sleep apnea? So. Yes. Apparently.” (Centre 3, patient 7)

“Actually I liked [seeing it beforehand], because this way I can by myself... otherwise I would have gone into it timidly like, tell me, what did you see? And now I could ask specific questions.” (Centre 3, patient 2)

Box 2:

“I think it’s very good, because you can from the beginning very clearly indicate your problems. So it doesn’t need to all be done during the short conversation you have with the specialist. [...] It’s clear it doesn’t need to be mentioned again, because it’s clear to her as well what the problems are.” (Centre 1, patient 4)

“Just that when you complete a questionnaire aimed at establishing something, then it’s useful that you also get a sort of result. So a preliminary... not that you should instantly think like nothing is wrong, nothing needs to be done, let’s get out of here. But, I did like it, yeah.” (Centre 1, patient 3)

“Well, because there were only two orange [smileys], and the others were all green and then you think, well.... And then when you look at it again then I’m like, ‘I can live with that’.” (Centre 2, patient 7)

### Healthcare professional perspective

Most healthcare professionals used the PRAQ during consultations (table 2), but usually briefly. Several professionals mentioned that, especially during intake consultations, they used it for the sake of the study. Only a few tried to provide more holistic care with the PRAQ. Some professionals stated that their minimal use of the PRAQ was due to unwillingness to change their practice, while others mentioned a general aversion to questionnaires, and/or not being convinced that the PRAQ would offer new or useful information considering what was already discussed during a regular consultation. There were also practical issues that to some extent hindered the uptake of the PRAQ: most notably the (limited) time available for consultations, and the fact that

the PRAQ was not embedded in the electronic health records which hindered the regular workflow. There were no notable differences in attitude towards the PRAQ between physicians, PAs and nurses.

Table 2. Use of PRAQ-report by interviewed healthcare professionals

| Use of the PRAQ-report during intake consultations    |                   |                    |                             |                  |
|-------------------------------------------------------|-------------------|--------------------|-----------------------------|------------------|
| Discussed it with patients                            | Only looked it up | Did not look at it | N/A <sup>1</sup>            |                  |
| 8                                                     | 1                 | 3                  | 2                           |                  |
| Use of the PRAQ-report during follow-up consultations |                   |                    |                             |                  |
| Discussed it with patients                            | Only looked it up | Did not look at it | Want to use it <sup>2</sup> | N/A <sup>1</sup> |
| 3                                                     | 1                 | 3                  | 6                           | 1                |

1. Not all healthcare professionals held both intake and follow-up consultations

2. Did not see (many) patients with follow-up PRAQ but are interested in using it in this setting

Most of the professionals that used the PRAQ did so at the end of their usual discussion of symptoms, to check whether all topics that were problematic had been discussed and potentially address more topics. As such they could still start the conversation in their usual way, allowing patients to explain their problems in their own words, and allowing the healthcare professionals to ask their standard diagnostic questions. Professionals indicated that most “symptoms” that are part of the PRAQ were already part of the standard diagnostic questions during an intake consultation (sleepiness, problems at night), and also overlapped with their usual (diagnostic) intake questionnaire. However, several professionals mentioned that the PRAQ-report increased discussion of the topic “health concerns”, which was considered valuable. Furthermore, the few professionals that indicated that they valued offering more holistic care noticed that the PRAQ was useful in drawing the conversation away from medical facts and more towards the underlying emotions related to a patient’s problems. However, many other professionals did not see much added value in actively bringing up topics like emotions and social interactions. They were potentially willing to discuss these issues but considered it up to the patient to raise them. If the PRAQ was used to identify problems, it was more common for the professional to mention very briefly that these problems were likely to improve with treatment of OSA, without further discussing these problems. Professionals reported that they did not notice any increase in OSA-related knowledge in their patients, or a difference in whether or how patients raised health complaints or quality of life issues of their own accord. Box 3 contains quotes illustrating the statements in this paragraph.

With regard to treatment choice, the professionals mentioned that the severity of symptoms generally only plays a role in patients with an  $AHI < 15$ , for which shared-decision making could potentially lead to a decision not to start clinical treatment for OSA. If the  $AHI$  is  $\geq 15$ , professionals generally wish to treat a patient for health reasons irrespective of symptoms. Many patients also have a reason to opt for treatment: there is a motor vehicle driving ban for untreated patients with  $AHI \geq 15$ .

Use of the PRAQ during follow-up consultations could not be fully evaluated, because a limited number of patients had completed the PRAQ at follow-up at the time of the interviews. This was due to practical implementation issues in combination with the relatively short duration of the study. However, several healthcare professionals mentioned that they thought the PRAQ would be more useful during follow-up consultations than intake conversations, as it would be interesting to see which problems remained after starting

1  
2  
3 treatment (table 2). Those that had the opportunity to use the PRAQ in this setting mentioned that it was nice to  
4 show patients how their problems had improved, with the improvement sometimes being greater than the  
5 patients had realised. This could be used as encouragement to continue with treatment.  
6  
7

8 Box 3:  
9

10  
11 “Well I myself don’t ask ‘are you worried about your [health]’? I won’t ask that, but that is what it shows.  
12 So then... then it’s like ‘hey, I would otherwise not have discussed that’.” (Centre 3, healthcare provider 4)

13  
14 “Yes, but then in a solution-oriented way - then you will see someone with 30 apneas an hour and you see  
15 that and you say I hope that [your problem with emotions] will get a lot better with the therapy I will start  
16 for you.” (Centre 1, healthcare provider 2)

17  
18 “Especially I thought people were, uhm... that lack of initiative, not going out, right? So they don’t do  
19 things because of their sleep problem, that was what [the PRAQ] often showed. And I didn’t always get  
20 that from taking the patient history. So people maybe find that hard to tell me, or they have trouble  
21 indicating that it really does have an impact on them. And then they try to focus more on the fact than on  
22 the underlying emotion. And that would sometimes give added value.” (Centre 1, healthcare provider 1)  
23  
24

### 25 3.2 Survey results

26 A total of 487 patients completed surveys pre-implementation, and 377 patients completed surveys post-  
27 implementation of the PRAQ. Characteristics of the survey populations pre-implementation and post-  
28 implementation can be found in table 3.  
29  
30  
31  
32  
33  
34  
35  
36  
37  
38  
39  
40  
41  
42  
43  
44  
45  
46  
47  
48  
49  
50  
51  
52  
53  
54  
55  
56  
57  
58  
59  
60

Table 3. Characteristics of the survey population

| Intake consultations                                                   |                            |                             |
|------------------------------------------------------------------------|----------------------------|-----------------------------|
|                                                                        | Pre-implementation (n=239) | Post-implementation (n=197) |
| Age (yrs)                                                              | 53.9                       | 55.4                        |
| Gender (% male)                                                        | 68.4                       | 69.5                        |
| Severity of symptoms <sup>1</sup>                                      | 6.50                       | 6.44                        |
| Diagnosed with OSA (%)                                                 | 82.8                       | 83.2                        |
| CPAP <sup>2</sup> (%)                                                  | 71.0                       | 70.7                        |
| MRA <sup>2,3</sup> (%)                                                 | 13.7                       | 19.5                        |
| Other treatment <sup>2</sup> (%)                                       | 10.7                       | 7.4                         |
| No treatment <sup>2</sup> (%)                                          | 1.0                        | 2.4                         |
| Missing <sup>2</sup> (%)                                               | 3.6                        | 0.0                         |
| Follow-up consultations                                                |                            |                             |
|                                                                        | Pre-implementation (n=248) | Post-implementation (n=180) |
| Age                                                                    | 57.33                      | 58.54                       |
| Gender (% male)                                                        | 75.3                       | 69.7                        |
| Severity of remaining symptoms or problems with treatment <sup>1</sup> | 4.25                       | 5.03                        |
| CPAP (%)                                                               | 89.1                       | 89.4                        |
| MRA <sup>3</sup> (%)                                                   | 3.6                        | 3.9                         |
| Other <sup>4</sup> or missing (%)                                      | 7                          | 5.6                         |

CPAP = continuous positive airway pressure, MRA = mandibular repositioning device 1. Scale 1-10, higher is more problems

2. Percentage of patients with this treatment of the total of patients diagnosed with OSA

3. Device worn over the teeth that pushes tongue and jaw forward to hold the airway open

4. Other possible treatments are surgery of the jaw or throat, and methods that will help a patient with positional OSA (who experiences breathing stops mainly when they lie on their backs) sleep on their side

Patients generally showed high agreement with the statements of the survey: 73.3% - 97.3% of patients indicated “agree” or “completely agree” per statement about the intake and follow-up consultations (table 4). Follow-up patients post-implementation showed significantly less agreement with the statement “In my opinion, my treatment is worth it for me” (p=.005). The main difference between pre- and post-implementation scores lies in distribution between scores 6 and 7 (‘agree’ and ‘completely agree’), with 68.2% of pre-implementation patients giving a score of 7, and 54.3% of post-implementation patients giving a score of 7. The other statements showed no obvious or statistically significant differences in the level of agreement pre- and post-implementation.

Table 4. Survey results<sup>1</sup>

| <b>Intake consultations</b>                                                               |                                |              |               |                        |        |                                  |              |               |                          |        |
|-------------------------------------------------------------------------------------------|--------------------------------|--------------|---------------|------------------------|--------|----------------------------------|--------------|---------------|--------------------------|--------|
| <b>Scores</b>                                                                             | <b>Pre-implementation PRAQ</b> |              |               |                        |        | <b>Post- implementation PRAQ</b> |              |               |                          |        |
|                                                                                           | 1-3<br>% (n)                   | 4-5<br>% (n) | 6-7<br>% (n)  | N /A <sup>2</sup><br>n | Median | 1-3<br>% (n)                     | 4-5<br>% (n) | 6-7<br>% (n)  | N /A <sup>2</sup><br>(n) | Median |
| I knew which problems I wanted to discuss with the doctor                                 | 17<br>(7.2)                    | 18<br>(7.7)  | 200<br>(85.1) | 4                      | 6      | 8<br>(4.2)                       | 14<br>(7.3)  | 170<br>(88.5) | 5                        | 6      |
| I discussed with the doctor the topics I wanted knew I wanted to discuss beforehand       | 22<br>(9.8)                    | 28<br>(12.5) | 174<br>(77.7) | 15                     | 6      | 16<br>(8.9)                      | 22<br>(12.2) | 142<br>(78.9) | 17                       | 6      |
| Because of my conversation with the doctor, I understand better what causes my problems   | 14<br>(6.0)                    | 14<br>(6.0)  | 206<br>(88.0) | 5                      | 6      | 6<br>(3.1)                       | 10<br>(5.1)  | 178<br>(91.8) | 3                        | 6      |
| The doctor and I chose the treatment together or together chose not to treat my apnea     | 14<br>(6.0)                    | 12<br>(5.2)  | 206<br>(88.8) | 7                      | 6      | 7<br>(3.6)                       | 14<br>(7.3)  | 172<br>(89.1) | 4                        | 6      |
| Because of my conversation with the doctor, I understand how the treatment can benefit me | 12<br>(5.6)                    | 12<br>(5.6)  | 192<br>(88.9) | 23                     | 6      | 4<br>(2.2)                       | 10<br>(5.4)  | 172<br>(92.5) | 11                       | 6      |
| I think the treatment will be worth it for me                                             | 10<br>(4.7)                    | 17<br>(8.0)  | 196<br>(87.3) | 26                     | 6      | 4<br>(2.2)                       | 18<br>(9.8)  | 161<br>(88.0) | 14                       | 6      |
| <b>Follow-up consultations</b>                                                            |                                |              |               |                        |        |                                  |              |               |                          |        |
| I knew which problems I wanted to discuss with the doctor                                 | 11<br>(5.1)                    | 10<br>(4.7)  | 194<br>(90.2) | 33                     | 7      | 5<br>(3.4)                       | 10<br>(6.9)  | 130<br>(89.7) | 35                       | 7      |
| I discussed with the doctor the topics I wanted to discuss                                | 10<br>(4.7)                    | 14<br>(6.5)  | 190<br>(88.8) | 34                     | 6      | 8<br>(5.7)                       | 9<br>(6.4)   | 123<br>(87.9) | 40                       | 6      |
| There was enough attention for the complaints that I still have                           | 7<br>(3.2)                     | 6<br>(2.7)   | 206<br>(94.1) | 29                     | 7      | 2<br>(1.4)                       | 2<br>(1.4)   | 144<br>(97.3) | 32                       | 7      |
| My complaints have lessened since start of my treatment                                   | 21<br>(8.9)                    | 36<br>(15.3) | 179<br>(75.8) | 12                     | 7      | 19<br>(11.5)                     | 25<br>(15.1) | 121<br>(73.3) | 15                       | 6      |
| In my opinion, my treatment is worth it for me*                                           | 7<br>(2.9)                     | 10<br>(4.2)  | 222<br>(92.9) | 9                      | 7      | 6<br>(3.4)                       | 12<br>(6.9)  | 157<br>(89.7) | 5                        | 7      |
| <b>Usefulness of the PRAQ</b>                                                             |                                |              |               |                        |        |                                  |              |               |                          |        |
| The PRAQ-report was useful for preparing my consultation <sup>3</sup>                     | -                              | -            | -             | -                      | -      | 6<br>(6.5)                       | 22<br>(23.9) | 64<br>(69.6)  | 2                        | 6      |
| The PRAQ-report was useful during my consultation <sup>4</sup>                            | -                              | -            | -             | -                      | -      | 3<br>(2.3)                       | 18<br>(13.6) | 111<br>(84.1) | 29                       | 6      |

\* Significant difference between pre- and post-implementation ( $p=.005$ , Mann-Whitney U test)

1. Scale 1-7 (1 = completely disagree, 2 = disagree, 3 = disagree a little, 4 = neither agree nor disagree, 5=agree a little, 6=agree, 7= completely agree)

2. "not applicable" (see supplementary file 4) or missing

3. Showing results for patients who indicated they had seen the PRAQ-report before their (intake or follow-up) consultation (n=94)

4. Showing results of patients who indicated the PRAQ-report was shown during their (intake or follow-up) consultation (n=161)

Patients showed high agreement with the two statements about the usefulness of the PRAQ-report, particularly regarding its use during a consultation (table 4). However, not all patients had completed the PRAQ and seen the PRAQ-report before or during their consultation. Patients who did not look up the PRAQ-report before their consultation may also have been the ones less interested in using the PRAQ-report, so the reported results may be somewhat biased towards a more positive evaluation (table 5).

Table 5. Percentage of patients that completed and viewed the PRAQ, and patient opinion on usefulness PRAQ

|                                                   | Intake (n=197) | Follow-up (n=180) |
|---------------------------------------------------|----------------|-------------------|
| Completed PRAQ before consultation                | 77.7%          | 51.1%             |
| Seen PRAQ-report before consultation <sup>1</sup> | 40.0%          | 44.4%             |
| Seen PRAQ-report during consultation <sup>1</sup> | 74.1%          | 60.2%             |

1. This percentage is a sub-percentage of the patients who indicated they completed the PRAQ

### 3.3 Electronic health record results

125 patients were included in the pre-implementation group, and 124 other patients in the post-implementation group. Patient characteristics are described in table 6. No differences were found with regard to how many patients with OSA received non-medical treatment (either no treatment at all or referral to a psychologist (table 7)), or in the number of patients for whom treatment was adjusted at the first follow-up consultation after starting CPAP treatment (table 8).

In both groups, 98 patients were prescribed CPAP. Patient characteristics did not differ between the two groups of patients with CPAP (data not shown). Compliance with CPAP treatment did not differ between the two groups (table 8).

Table 6. Patient file study: patient characteristics

|                           | Pre-implementation (n=125) | Post-implementation (n=124) |
|---------------------------|----------------------------|-----------------------------|
| Age (SD)                  | 55,4 (12,0)                | 56,6 (15,7)                 |
| Gender                    | 68% male                   | 67,7% male                  |
| BMI (SD)                  | 31,4 (6,5)                 | 30,8 (6,1)                  |
| AHI (SD)                  | 23,1(16,1)                 | 25,0 (18,5)                 |
| AHI < 15                  | 40,8%                      | 33,9%                       |
| ESS (SD)                  | 8,0 (4,8)                  | 7,4 (5,0)                   |
| Start with CPAP at intake | 78,4%                      | 79,0%                       |



Table 7. Treatment choice at intake<sup>1</sup>

|                                             | Pre-implementation (n=125) | Post-implementation (n=124) <sup>1</sup> | Pre-implementation, AHI <15 (n=51) | Post-implementation, AHI <15 (n=42) |
|---------------------------------------------|----------------------------|------------------------------------------|------------------------------------|-------------------------------------|
| Medical treatment for OSA (incl CPAP) (n,%) | 123 (98.4)                 | 123 (99.2)                               | 49 (96.1)                          | 41 (97.6)                           |
| No medical treatment for OSA (n,%)          | 2 (1.6)                    | 1 (0.8)                                  | 2 (3.9)                            | 1 (2.4)                             |
| Referred to psychologist (n, %)             | 2 (1.6)                    | 0 (0)                                    | 2 (3.9)                            | 0 (0)                               |
| No treatment (n, %)                         | 0 (0)                      | 1 (0.8)                                  | 0 (0)                              | 1 (2.4)                             |

1. If nothing is indicated, no significant difference was found.

Table 8. Treatment adjustments and compliance in patients with CPAP at the first follow-up<sup>1</sup>

|                                      | Pre-implementation of PRAQ (n=98) | Post-implementation of PRAQ (n=98) | Missings                       |
|--------------------------------------|-----------------------------------|------------------------------------|--------------------------------|
| Adjustment of current treatment      | 45                                | 36                                 | N/A <sup>2</sup>               |
| Switch to different treatment        | 5                                 | 9                                  | N/A <sup>2</sup>               |
| Referral to different specialization | 6                                 | 2                                  | N/A <sup>2</sup>               |
| CPAP compliance <sup>3</sup> (SD)    | 5:47 hrs (2:11)                   | 5:53 hrs (2:10)                    | Pre-impl.: 11<br>Post-impl.: 7 |
| CPAP compliance <4hrs                | 25.0%                             | 27.5%                              | Pre-impl.: 11<br>Post-impl.: 7 |
| Stopped CPAP treatment               | 4.1%                              | 5.1%                               | N/A <sup>2</sup>               |

1. If nothing is indicated, no significant difference was found.

2. If nothing was noted down in the patient health record, it was assumed this did not take place. Therefore missings are not applicable.

3. Hours of CPAP use by patients who had stopped treatment altogether (see “stopped CPAP treatment”) are not included in this number.

#### 4. Discussion

This exploratory study showed limited success regarding the uptake of the PRAQ in the daily clinical practice of sleep centers, and the improvement of patient-centeredness of care. From the interviews it became clear that most patients were willing to complete the PRAQ and were generally positive about the usefulness of the PRAQ before the consultation (e.g. because of feeling more informed) and during the consultation (due to the clear visual representation of their problems). This may therefore have led to some improvement of preparation for the consultation by patients, and better communication, though this is not reflected in the results of the patient survey. Amongst healthcare professionals the willingness to use the PRAQ-report in consultations differed, as the perceived need was minimal. Most of the professionals that used the PRAQ also reported that the impact on their consultations was minor. Therefore, it is not surprising that comparison of health records pre- and post-implementation of the PRAQ did not show any differences in treatment choice and CPAP compliance.

The interviews showed that the professionals mostly felt that they already sufficiently address the “symptom-like” topics of the PRAQ (sleepiness, problems at night) in their usual care, in the context of setting a diagnosis. The topics of the PRAQ that are not necessary for setting a diagnosis, but could potentially be used to motivate patients for their treatment, were not seen as essential to discuss by many professionals. The limited perceived benefit of the PRAQ is likely also mitigated by the fact that many steps of the care process have to be



1  
2  
3 covered during the intake consultation, including discussing the sleep study results and choosing a treatment.  
4 This leaves little extra time to discuss a patient's quality of life and detailed treatment goals. Furthermore,  
5 burden of disease plays a limited role in setting a diagnosis when  $AHI \geq 15$ , due to views on strict medical  
6 necessity of treatment, but also due to the driving ban for untreated patients. Therefore, adding the PRAQ to the  
7 current practice for OSA does not appear to be a sufficient trigger to increase attention to quality of life issues.  
8  
9

10 Patients generally held a more positive view towards the usefulness of the PRAQ. From the interviews  
11 it became clear that completing the PRAQ has the potential to give patients more insight into their OSA-related  
12 health complaints and encourages communication between family members. Furthermore, the patient survey  
13 results indicated that patients thought the PRAQ-report was useful for their preparation for the consultation and  
14 (when it was used by the healthcare professional) during the consultation.  
15  
16

17 Agreement to the patient survey statement "I feel like my treatment is worth it for me" was significantly  
18 lower on the post-implementation survey than on the pre-implementation survey. The main difference was in the  
19 number of patients indicating "agree" versus "completely agree", meaning both pre-and post-implementation of  
20 the PRAQ patients were very positive about their treatment. This being an exploratory study, statistically  
21 significant results should be interpreted with caution, and we deem the relevance of this finding to be limited.  
22  
23

24 There appears to be room for improvement of communication around the PRAQ, as there was confusion  
25 for some patients around the necessity of still discussing symptoms during the consultation. Whereas some  
26 patients seemed to be more interested in hearing their sleep study results than talk about their symptoms, for the  
27 healthcare professionals hearing about the patient's symptoms in their own words is an essential part of the  
28 diagnosis. It may be beneficial to communicate the purpose of the PRAQ more clearly in the invitation email,  
29 and/or to instruct professionals to, at the beginning of their consultation, mention the PRAQ to patients and how  
30 its results will be addressed. More in-depth discussion with the field about what is most suitable or desirable in  
31 this context is needed.  
32  
33  
34  
35  
36

37 In the past few years, several similar initiatives involving PROMs have been introduced in The Netherlands,  
38 such as the Assessment of Burden of COPD (ABC) tool (34), the Nijmegen Clinical Screening Instrument for  
39 COPD(35), the QLIC-ON PROfile for children (36), and MyIBDcoach for patients with inflammatory bowel  
40 disease(37). Studies into these applications show promising results regarding their benefits (37, 38) despite some  
41 resistance from professionals who do not believe in the added benefit or believe the tool would be more useful  
42 for different professionals within the care pathway (39, 40). However, the healthcare professionals' skepticism  
43 about the potential benefits of the PRAQ seems to be more extensive. Potentially, professionals will see greater  
44 benefit of the PRAQ in the context of the recently released new guidelines for OSA (30) with their greater  
45 emphasis on (improving) burden of disease, which were not yet available at the time of this study. However, the  
46 question remains whether a more "holistic" approach to caring for OSA patients fits within the current setting of  
47 relatively short intake consultations which take place after the patients' diagnostic sleep study. It may be  
48 necessary to move towards a reorganization of care: for example to plan the intake consultations before the sleep  
49 study to allow for more focus on the individual patients' symptoms and problems, and to specifically evaluate  
50 the necessity of doing a diagnostic sleep study. Additionally, integrating the PRAQ in the electronic health  
51 record will help professionals fit the PRAQ-report better into their workflow.  
52  
53  
54  
55  
56  
57  
58  
59  
60

1  
2  
3 Another option that can be explored is to adapt the PRAQ itself or the context in which it is used, in  
4 order to fit better to healthcare professionals' preferences. For example, an option would be to remove the  
5 domains of the PRAQ focused on symptoms that are (nearly) always discussed already, and instead put the focus  
6 on the additional domains. It is also possible to distribute the PRAQ to a more select group of patients, for  
7 example by moving the first measurement moment to the follow-up consultation, therefore targeting only  
8 patients with a diagnosis and treatment. It could then be used to identify those patients still experiencing  
9 problems. Downside to both of these adaptations is that they limit the option to monitor changes over time on all  
10 domains that are relevant for patients with OSA, while monitoring over time is what most interviewed healthcare  
11 professionals are interested in. Not having a baseline measurement would also limit the options to usefully study  
12 the PRAQ data on aggregate level. It may be most feasible to let sleep centers decide how they want to use the  
13 PRAQ in the context of what is desirable to them, which may also evolve over time. It is hoped that they will  
14 also take into account the patient perspective when deciding how to use the PRAQ.  
15  
16  
17  
18  
19  
20  
21

### 22 Strengths and limitations of the study

23 The major strength of this study is that we used mixed methods, which provides insight into the reasons why the  
24 PRAQ does not work as intended. Many other studies on PROMs study only *whether* a PROM works, rather  
25 than why or how.  
26

27 There are also limitations to the study. First, the survey used for this study was not tested and maybe not  
28 discriminative enough to show differences between the groups pre- and post-implantation of the PRAQ.  
29 Potentially, patients who have not completed the PRAQ do not know that, for example, their preparation for the  
30 consultation could maybe have been better than it currently was. Second, electronic health records were only  
31 studied in one of the included sleep centers. However, considering the information we collected in the  
32 interviews, we do not expect that we would have found different results in either of the other two sleep centers.  
33 Third, though technically there was enough time in this study for professionals to also use the PRAQ during the  
34 first follow-up consultation, practical implementation issues as well as a lack of initiative from healthcare  
35 professionals to actively check whether a follow-up PRAQ was available meant that it was not used often at this  
36 time point. Therefore we did not gain much insight into the potential use of the PRAQ for follow-up  
37 consultations. Lastly, only patients who looked up the PRAQ-report could give an opinion on its usefulness for  
38 preparing the consultation in the survey. However, patients who did not look up the PRAQ-report may also be  
39 generally less interested in these kinds of tools and, if they had looked it up, may have experienced it as less  
40 useful. Additionally, patients who have a more positive opinion on the PRAQ may be more likely to complete  
41 the items on its usefulness.  
42  
43  
44  
45  
46  
47  
48  
49

### 50 Conclusions

51 Using the PRAQ in the daily clinical practice of OSA is viewed as useful by patients, but the enthusiasm of  
52 healthcare professionals differed per individual and was generally not very great. Implementation of the PRAQ  
53 does not seem a sufficient trigger to focus more attention to quality of life during consultations, and in current  
54 practice does not show impact on treatment choice or CPAP compliance. However, new Dutch guidelines for  
55 OSA care that have recently been published may lead to a greater emphasis on quality of life for patients,  
56 making the integration of the PRAQ in clinical care potentially more useful.  
57  
58  
59  
60

1  
2  
3  
4  
5  
6 Additional information:

7  
8 Funding: The first author was funded by the Radboudumc grant number R0002257. The funding organization  
9 had no role in the design, implementation, interpretation, or reporting of this study.  
10

11 Conflicts of interest: All authors declare that they have no competing interests.  
12  
13

14 Author contributions: IA, MR, PW, MI, GW and BH were involved in the conception and design. IA and MN  
15 conducted and analysed the interviews. IA collected and analysed the quantitative data. IA and PW interpreted  
16 the quantitative data. IA drafted the manuscript. IA, MR, PW, MI, MN, GW and BH critically revised the  
17 manuscript for important intellectual content.  
18  
19

20 Data sharing statement: Data is available from the corresponding author upon reasonable request.  
21  
22

23 Ethics approval: Ethical approval is not required for this type of study under Dutch law, and an exemption was  
24 obtained by the local Medical Ethics Committee “CMO Regio Arnhem-Nijmegen”.  
25  
26  
27  
28  
29  
30  
31  
32  
33  
34  
35  
36  
37  
38  
39  
40  
41  
42  
43  
44  
45  
46  
47  
48  
49  
50  
51  
52  
53  
54  
55  
56  
57  
58  
59  
60

## References

1. Valderas JM, Alonso J, Guyatt GH. Measuring patient-reported outcomes: moving from clinical trials into clinical practice. *The Medical journal of Australia*. 2008;189(2):93-4.
2. Fleischmann M, Vaughan B. The challenges and opportunities of using patient reported outcome measures (PROMs) in clinical practice. *Int J Osteopath Med*. 2018:1-6.
3. Howell D, Molloy S, Wilkinson K, Green E, Orchard K, Wang K, et al. Patient-reported outcomes in routine cancer clinical practice: a scoping review of use, impact on health outcomes, and implementation factors. *Ann Oncol*. 2015;26(9):1846-58.
4. Greenhalgh J, Dalkin S, Gooding K, Gibbons E, Wright J, Meads D, et al. Functionality and feedback: a realist synthesis of the collation, interpretation and utilisation of patient-reported outcome measures data to improve patient care. *Health Services and Delivery Research*. Southampton (UK)2017.
5. Van Der Wees PJ, Nijhuis-Van Der Sanden MW, Ayanian JZ, Black N, Westert GP, Schneider EC. Integrating the use of patient-reported outcomes for both clinical practice and performance measurement: views of experts from 3 countries. *The Milbank quarterly*. 2014;92(4):754-75.
6. Valderas JM, Kotzeva A, Espallargues M, Guyatt G, Ferrans CE, Halyard MY, et al. The impact of measuring patient-reported outcomes in clinical practice: a systematic review of the literature. *Quality of life research : an international journal of quality of life aspects of treatment, care and rehabilitation*. 2008;17(2):179-93.
7. Boyce MB, Browne JP. Does providing feedback on patient-reported outcomes to healthcare professionals result in better outcomes for patients? A systematic review. *Quality of life research : an international journal of quality of life aspects of treatment, care and rehabilitation*. 2013;22(9):2265-78.
8. Holmes MM, Lewith G, Newell D, Field J, Bishop FL. The impact of patient-reported outcome measures in clinical practice for pain: a systematic review. *Quality of life research : an international journal of quality of life aspects of treatment, care and rehabilitation*. 2017;26(2):245-57.
9. Greenhalgh J, Dalkin S, Gibbons E, Wright J, Valderas JM, Meads D, et al. How do aggregated patient-reported outcome measures data stimulate health care improvement? A realist synthesis. *J Health Serv Res Policy*. 2018;23(1):57-65.
10. Bjornsdottir E, Benediktsdottir B, Pack AI, Arnardottir ES, Kuna ST, Gislason T, et al. The Prevalence of Depression among Untreated Obstructive Sleep Apnea Patients Using a Standardized Psychiatric Interview. *Journal of clinical sleep medicine : JCSM : official publication of the American Academy of Sleep Medicine*. 2016;12(1):105-12.
11. O'Donoghue N, McKay E. Exploring the impact of sleep apnoea on daily life and occupational engagement. *Br J Occup Ther*. 2012;75(11):609-516.
12. Reishtein JL, Pack AI, Maislin G, Dinges DF, Bloxham TJ, George CF, et al. Sleepiness and relationships in obstructive sleep apnea. *Issues Ment Health Nurs*. 2006;27(3):319-30.
13. Bradley TD, Floras JS. Obstructive sleep apnoea and its cardiovascular consequences. *Lancet*. 2009;373(9657):82-93.
14. Chan AS, Phillips CL, Cistulli PA. Obstructive sleep apnoea--an update. *Intern Med J*. 2010;40(2):102-6.
15. Young T, Peppard PE, Gottlieb DJ. Epidemiology of obstructive sleep apnea: a population health perspective. *Am J Respir Crit Care Med*. 2002;165(9):1217-39.
16. Senaratna CV, Perret JL, Lodge CJ, Lowe AJ, Campbell BE, Matheson MC, et al. Prevalence of obstructive sleep apnea in the general population: A systematic review. *Sleep Med Rev*. 2017;34:70-81.
17. Medicine AAoS. International Classification of Sleep Disorders. Diagnostic and Coding Manual. . In: Medicine AAoS, editor. 3rd edition ed2014.
18. Committee DCS. International Classification of Sleep Disorders: Diagnostic and Coding Manual. In: Association ASD, editor. Rochester1990.

19. Macey PM, Woo MA, Kumar R, Cross RL, Harper RM. Relationship between obstructive sleep apnea severity and sleep, depression and anxiety symptoms in newly-diagnosed patients. *PLoS One*. 2010;5(4):e10211.
20. Tam S, Woodson BT, Rotenberg B. Outcome measurements in obstructive sleep apnea: beyond the apnea-hypopnea index. *Laryngoscope*. 2014;124(1):337-43.
21. Kingshott RN, Engleman HM, Deary IJ, Douglas NJ. Does arousal frequency predict daytime function? *The European respiratory journal*. 1998;12(6):1264-70.
22. Turnbull CD, Stradling JR. To screen or not to screen for obstructive sleep apnea, that is the question. *Sleep Med Rev*. 2017;36:125-7.
23. Van Dongen HP, Baynard MD, Maislin G, Dinges DF. Systematic interindividual differences in neurobehavioral impairment from sleep loss: evidence of trait-like differential vulnerability. *Sleep*. 2004;27(3):423-33.
24. Abuzaid AS, Al Ashry HS, Elbadawi A, Ld H, Saad M, Elgendy IY, et al. Meta-Analysis of Cardiovascular Outcomes With Continuous Positive Airway Pressure Therapy in Patients With Obstructive Sleep Apnea. *Am J Cardiol*. 2017;120(4):693-9.
25. Yu J, Zhou Z, McEvoy RD, Anderson CS, Rodgers A, Perkovic V, et al. Association of Positive Airway Pressure With Cardiovascular Events and Death in Adults With Sleep Apnea: A Systematic Review and Meta-analysis. *JAMA*. 2017;318(2):156-66.
26. Marin JM, Agusti A, Villar I, Forner M, Nieto D, Carrizo SJ, et al. Association between treated and untreated obstructive sleep apnea and risk of hypertension. *JAMA*. 2012;307(20):2169-76.
27. Barbe F, Duran-Cantolla J, Sanchez-de-la-Torre M, Martinez-Alonso M, Carmona C, Barcelo A, et al. Effect of continuous positive airway pressure on the incidence of hypertension and cardiovascular events in nonsleepy patients with obstructive sleep apnea: a randomized controlled trial. *JAMA*. 2012;307(20):2161-8.
28. McNicholas WT. Diagnostic criteria for obstructive sleep apnea: time for reappraisal. *J Thorac Dis*. 2018;10(1):531-3.
29. McNicholas WT, Bassetti CL, Ferini-Strambi L, Pepin JL, Pevernagie D, Verbraecken J, et al. Challenges in obstructive sleep apnoea. *Lancet Respir Med*. 2018;6(3):170-2.
30. NVALT. Richtlijn diagnostiek en behandeling van obstructief slaapapneu (OSA) bij volwassenen. Richtlijndatabase.nl: Nederlandse Vereniging van Artsen voor Longziekten en Tuberculose; 2017.
31. Abma IL, Rovers M, IJff M, Hol B, Westert GP, Van der Wees PJ. The development of a patient-reported outcome measure for patients with obstructive sleep apnea: the Patient-Reported Apnea Questionnaire (PRAQ). *Journal of Patient-Reported Outcomes*. 2017;1(14).
32. Abma IL, Rovers M, M IJ, Hol B, Westert GP, van der Wees PJ. Instrument completion and validation of the patient-reported apnea questionnaire (PRAQ). *Health Qual Life Outcomes*. 2018;16(1):158.
33. Grunstein RR. Sleep-related breathing disorders. 5. Nasal continuous positive airway pressure treatment for obstructive sleep apnoea. *Thorax*. 1995;50(10):1106-13.
34. Slok AH, in 't Veen JC, Chavannes NH, van der Molen T, Rutten-van Molken MP, Kerstjens HA, et al. Development of the Assessment of Burden of COPD tool: an integrated tool to measure the burden of COPD. *NPJ Prim Care Respir Med*. 2014;24:14021.
35. Peters JB, Daudey L, Heijdra YF, Molema J, Dekhuijzen PN, Vercoulen JH. Development of a battery of instruments for detailed measurement of health status in patients with COPD in routine care: the Nijmegen Clinical Screening Instrument. *Quality of life research : an international journal of quality of life aspects of treatment, care and rehabilitation*. 2009;18(7):901-12.
36. Engelen V, Haverman L, Koopman H, Schouten-van Meeteren N, Meijer-van den Bergh E, Vrijmoet-Wiersma J, et al. Development and implementation of a patient reported outcome intervention (QLIC-ON PROfile) in clinical paediatric oncology practice. *Patient Educ Couns*. 2010;81(2):235-44.
37. de Jong MJ, van der Meulen-de Jong AE, Romberg-Camps MJ, Becx MC, Maljaars JP, Cilissen M, et al. Telemedicine for management of inflammatory bowel disease (myIBDcoach): a pragmatic, multicentre, randomised controlled trial. *Lancet*. 2017;390(10098):959-68.
38. Slok AH, Kotz D, van Breukelen G, Chavannes NH, Rutten-van Molken MP, Kerstjens HA, et al. Effectiveness of the Assessment of Burden of COPD (ABC) tool on health-related quality of life in

1  
2  
3 patients with COPD: a cluster randomised controlled trial in primary and hospital care. *BMJ Open*.  
4 2016;6(7):e011519.

5 39. Schepers SA, Sint Nicolaas SM, Haverman L, Wensing M, Schouten van Meeteren AYN,  
6 Veening MA, et al. Real-world implementation of electronic patient-reported outcomes in outpatient  
7 pediatric cancer care. *Psychooncology*. 2017;26(7):951-9.

8 40. Slok AH, Twellaar M, Jutbo L, Kotz D, Chavannes NH, Holverda S, et al. 'To use or not to  
9 use': a qualitative study to evaluate experiences of healthcare providers and patients with the  
10 assessment of burden of COPD (ABC) tool. *NPJ Prim Care Respir Med*. 2016;26:16074.  
11  
12  
13  
14  
15  
16  
17  
18  
19  
20  
21  
22  
23  
24  
25  
26  
27  
28  
29  
30  
31  
32  
33  
34  
35  
36  
37  
38  
39  
40  
41  
42  
43  
44  
45  
46  
47  
48  
49  
50  
51  
52  
53  
54  
55  
56  
57  
58  
59  
60

For peer review only



### Supplementary file 1: The PRAQ-report and its implementation in clinical practice

In the PRAQ-report (shown on the next page), the results of each of the ten PRAQ-domains are shown in the form of a colored smiley, ranging from green (patient indicated very few problems) to dark red (patient indicated a lot of problems). Domain scores over time and individual item scores are shown on subsequent pages of the PRAQ-report. The included domains were: symptoms at night, sleepiness, tiredness, daily activities, unsafe situations, memory and concentration, quality of sleep, emotions, social activities, and health concerns. The PRAQ also contains a set of “intake questions” that were designed together with the participating centers and aimed to replace the diagnostic intake questionnaires that the centers usually distribute to all their new patients. This involved more factual, broader questions to help professionals in setting a correct diagnosis.

The PRAQ was distributed via a secure online platform (VitalHealth QuestManager) which sent out email invitations to a patient to complete the PRAQ at ten and (if the PRAQ was not yet completed) three days before the patient’s consultation. After completion of the PRAQ, patients and healthcare professionals both had the ability to access the PRAQ-report directly from the online platform.

Individual implementation plans for collecting email addresses of patients, creating patient accounts, and entering consultation dates were developed for each study center to optimally fit their usual work flow.

Healthcare professionals received information about the content of the PRAQ and PRAQ-report, and instructions and a short training in how to use QuestManager. They were then encouraged to integrate the PRAQ into their own workflow in whichever way each individual professional found most convenient. After approximately two months of using the PRAQ, the researchers organized a meeting in each sleep centre in which the healthcare professionals were invited to discuss how they were using the PRAQ-report in their practice, in order to exchange ideas and potentially adjust their way of using the PRAQ.

1  
2  
3  
4  
5  
6  
7  
8  
9  
10  
11  
12  
13  
14  
15  
16  
17  
18  
19  
20  
21  
22  
23  
24  
25  
26  
27  
28  
29  
30  
31  
32  
33  
34  
35  
36  
37  
38  
39  
40  
41  
42  
43  
44  
45  
46  
47  
48  
49  
50  
51  
52  
53  
54  
55  
56  
57  
58  
59  
60

**PRAQ-report**

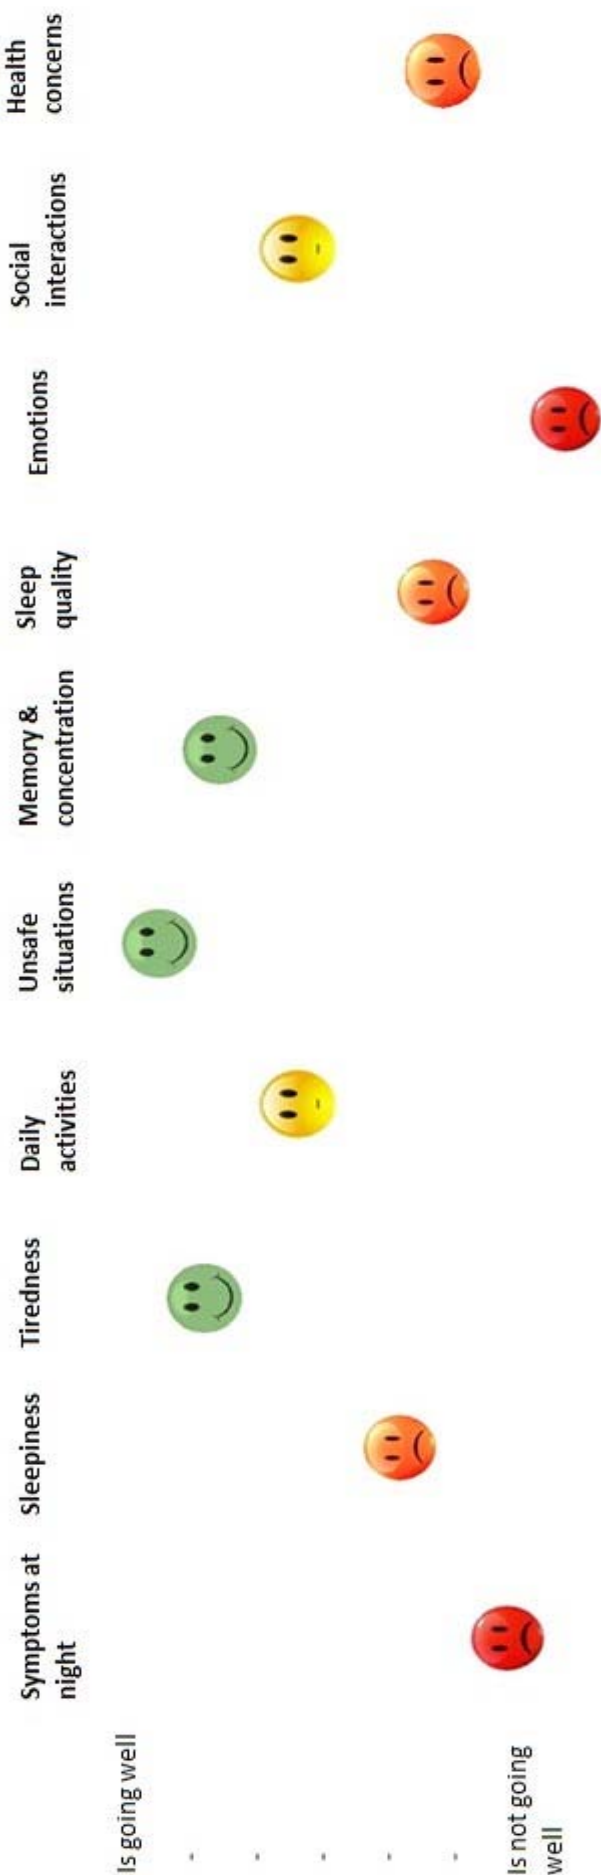

Preprint



1  
2  
3 **Supplementary file 2 – The Patient-Reported Apnea Questionnaire (PRAQ) and PRAQ-report**  
4  
5  
6

|                                                                                                                                                                                                                                                                                                                                                                                                                                                                                                                                                                                                                                                             |
|-------------------------------------------------------------------------------------------------------------------------------------------------------------------------------------------------------------------------------------------------------------------------------------------------------------------------------------------------------------------------------------------------------------------------------------------------------------------------------------------------------------------------------------------------------------------------------------------------------------------------------------------------------------|
| <b>Symptoms at night</b>                                                                                                                                                                                                                                                                                                                                                                                                                                                                                                                                                                                                                                    |
| During the past 4 weeks, did you have a problem with:<br>1. Snoring loudly?<br>2. Waking up frequently to urinate?<br>3. Waking up at night with the feeling that you are choking?<br>4. A feeling that you are sleeping restlessly?<br>5. Having a dry or painful mouth when you wake up?<br>6. Waking up in the morning with a headache?                                                                                                                                                                                                                                                                                                                  |
| <b>Sleepiness</b>                                                                                                                                                                                                                                                                                                                                                                                                                                                                                                                                                                                                                                           |
| During the past 4 weeks, did you have a problem with:<br>7. Fighting to stay awake during the day?<br>8. Suddenly falling asleep?<br>9. Difficulty staying awake during a conversation?<br>10. Difficulty staying awake while watching something? (concert, movie, television)<br>11. Falling asleep at inappropriate times or places?                                                                                                                                                                                                                                                                                                                      |
| <b>Tiredness</b>                                                                                                                                                                                                                                                                                                                                                                                                                                                                                                                                                                                                                                            |
| During the past 4 weeks, did you have a problem with:<br>12. Feeling very tired?<br>13. Lacking energy?<br>14. Still feeling tired when you wake up in the morning?                                                                                                                                                                                                                                                                                                                                                                                                                                                                                         |
| <b>Daily activities</b>                                                                                                                                                                                                                                                                                                                                                                                                                                                                                                                                                                                                                                     |
| During the past 4 weeks:<br>15. How difficult was it for you to do your most important daily activity? (such as your job, studying, caring for the children, housework)<br>16. How often did you use all your energy to accomplish only your most important daily activity? (such as your job, studying, caring for the children, housework)<br>17. Did you feel you have a decreased performance with regard to your most important daily activity? (such as your job, studying, caring for the children, housework)<br>18. How much difficulty did you have finding energy for your hobbies?<br>19. How difficult was it for you to get your chores done? |
| <b>Unsafe situations</b>                                                                                                                                                                                                                                                                                                                                                                                                                                                                                                                                                                                                                                    |
| During the past 4 weeks:<br>20. Did you have problems while driving a car due to sleepiness? <sup>1</sup><br>21. Were you concerned about your safety or that of others due to your sleepiness? (for example in traffic, or when operating machinery)                                                                                                                                                                                                                                                                                                                                                                                                       |
| <b>Memory and concentration</b>                                                                                                                                                                                                                                                                                                                                                                                                                                                                                                                                                                                                                             |
| During the past 4 weeks:<br>22. Were you sometimes forgetful?<br>23. Did you sometimes have difficulty concentrating?                                                                                                                                                                                                                                                                                                                                                                                                                                                                                                                                       |
| <b>Quality of sleep</b>                                                                                                                                                                                                                                                                                                                                                                                                                                                                                                                                                                                                                                     |
| During the past 4 weeks, did you have a problem with:<br>24. Falling asleep when you go to bed at night?<br>25. Getting back to sleep after you woke up at night?                                                                                                                                                                                                                                                                                                                                                                                                                                                                                           |
| <b>Emotions</b>                                                                                                                                                                                                                                                                                                                                                                                                                                                                                                                                                                                                                                             |
| During the past 4 weeks:<br>26. How often did you feel depressed or hopeless?<br>27. How often did you feel anxious?<br>28. How often did you lose your temper?<br>29. How often did you feel that you could not cope with everyday life?<br>30. How often did you feel irritated?<br>31. How often did you have a strong emotional reaction to everyday events?                                                                                                                                                                                                                                                                                            |

**Social interactions**

During the past 4 weeks:

32. Did you sometimes feel upset because others were disturbed by your snoring?
33. Was it a problem for you that you sometimes had no energy or no desire to do things with your family or your friends?
34. Did you feel guilty towards your family or friends?
35. Did you feel upset because you argued frequently?
36. Did you sometimes experience problems in the relationship with your partner?<sup>1</sup>
37. Did you feel upset because you could (maybe) not sleep in the same room as your partner?<sup>1</sup>
38. Did you sometimes think up excuses because you were tired or sleepy?
39. Did you have a problem with unsatisfying and/or too little sexual activity? (by yourself or with another)<sup>1</sup>

**Health concerns**

40. Were you concerned about other conditions that may be related to sleep apnea? (such as diabetes, high blood pressure, cardiovascular disease, being overweight)

1. These items had an additional response option “not applicable” or (for item 39) “no answer”

### Supplementary file 3: information about the interviews and coding

Interviewers IA and MN held the patient interviews based on the interview guides, mostly together but MN did some patient interviews alone, and IA did some patient and some professional interviews alone. IA had some training in qualitative research/interviewing, and participated in qualitative study with interviews before. MN did not have official training but received some interview training from IA. IA was the developer of the PRAQ and PRAQ-report, and the healthcare professionals were aware of this, which may have lead to bias. However, this was specifically addressed before the start of the interviews, reminding the interviewees that this was scientific research and the researchers were looking for honest opinions in order to learn more about the application of PROMs in clinical practice, and negative opinions were also welcome. The patients were not told that IA was the developer of the PRAQ.

Patient recruitment took place in two different ways:

- Patients were approached via email by the sleep center before their scheduled consultation. The email was sent directly via the online platform as an added message to the invitation to complete the PRAQ, or by a team member of the sleep center.
- All patients scheduled on a certain specific day for a specific healthcare professional that had completed the PRAQ, were invited by their healthcare professional to participate directly after their consultation.

18 patients were interviewed face to face at the sleep center after their consultation in a private room; 9 patients were interviewed over the phone for convenience reasons. The patient interviews lasted on average 15 minutes. Healthcare provider interviews lasted on average 44 minutes and were all held at the sleep center. All interviews were audiotaped, transcribed verbatim and anonymised. All interviewees were provided with information about the study and signed an informed consent form or gave verbal informed consent on the audiotape. Transcripts of the interviews were not provided to the interviewees. Analysis of the interviews took place via open coding, with different code books for patients and healthcare providers. IA and MN first coded five interviews independently for both patients and healthcare professional interviews. A researcher (IG) experienced in qualitative research and knowledgeable about PROMs, but not involved in the study, coded one of the healthcare professional interviews independently. IG, IA, MN and PW held a collaborative coding session in which the code books were constructed. MN analyzed all remaining interviews, which IA then read and checked to the code book. When there was a disagreement about the coding, IA and MN reached consensus.

Supplementary file 4: Patient survey. Version: intake consultation, post-implementation of the PRAQ.

**When answering the questions, keep in mind the consultation that you just attended.**

**1. I knew which problems I wanted to discuss with the doctor**

|                               |                          |                          |                                |                          |                          |                            |                          |
|-------------------------------|--------------------------|--------------------------|--------------------------------|--------------------------|--------------------------|----------------------------|--------------------------|
| completely<br><u>disagree</u> | disagree                 | disagree<br>a litte      | don't agree,<br>don't disagree | agree<br>a little        | agree                    | completely<br><u>agree</u> | not<br>applicable*       |
| <input type="checkbox"/>      | <input type="checkbox"/> | <input type="checkbox"/> | <input type="checkbox"/>       | <input type="checkbox"/> | <input type="checkbox"/> | <input type="checkbox"/>   | <input type="checkbox"/> |

**2. I discussed with the doctor the topics I knew I wanted to discuss beforehand**

|                               |                          |                          |                                |                          |                          |                            |                          |
|-------------------------------|--------------------------|--------------------------|--------------------------------|--------------------------|--------------------------|----------------------------|--------------------------|
| completely<br><u>disagree</u> | disagree                 | disagree<br>a litte      | don't agree,<br>don't disagree | agree<br>a little        | agree                    | completely<br><u>agree</u> | not<br>applicable*       |
| <input type="checkbox"/>      | <input type="checkbox"/> | <input type="checkbox"/> | <input type="checkbox"/>       | <input type="checkbox"/> | <input type="checkbox"/> | <input type="checkbox"/>   | <input type="checkbox"/> |

**3. Because of my conversation with the doctor, I understand better what causes my health complaints or problems**

|                               |                          |                          |                                |                          |                          |                            |                          |
|-------------------------------|--------------------------|--------------------------|--------------------------------|--------------------------|--------------------------|----------------------------|--------------------------|
| completely<br><u>disagree</u> | disagree                 | disagree<br>a litte      | don't agree,<br>don't disagree | agree<br>a little        | agree                    | completely<br><u>agree</u> | not<br>applicable*       |
| <input type="checkbox"/>      | <input type="checkbox"/> | <input type="checkbox"/> | <input type="checkbox"/>       | <input type="checkbox"/> | <input type="checkbox"/> | <input type="checkbox"/>   | <input type="checkbox"/> |

**4. The doctor and I chose the treatment together, or together chose not to treat my apnea**

|                               |                          |                          |                                |                          |                          |                            |                          |
|-------------------------------|--------------------------|--------------------------|--------------------------------|--------------------------|--------------------------|----------------------------|--------------------------|
| completely<br><u>disagree</u> | disagree                 | disagree<br>a litte      | don't agree,<br>don't disagree | agree<br>a little        | agree                    | completely<br><u>agree</u> | not<br>applicable**      |
| <input type="checkbox"/>      | <input type="checkbox"/> | <input type="checkbox"/> | <input type="checkbox"/>       | <input type="checkbox"/> | <input type="checkbox"/> | <input type="checkbox"/>   | <input type="checkbox"/> |

**5. Because of my conversation with the doctor, I understand how the treatment can benefit me**

|                               |                          |                          |                                |                          |                          |                            |                          |
|-------------------------------|--------------------------|--------------------------|--------------------------------|--------------------------|--------------------------|----------------------------|--------------------------|
| completely<br><u>disagree</u> | disagree                 | disagree<br>a litte      | don't agree,<br>don't disagree | agree<br>a little        | agree                    | completely<br><u>agree</u> | not<br>applicable**      |
| <input type="checkbox"/>      | <input type="checkbox"/> | <input type="checkbox"/> | <input type="checkbox"/>       | <input type="checkbox"/> | <input type="checkbox"/> | <input type="checkbox"/>   | <input type="checkbox"/> |

**6. I think the treatment will be worth it for me**

|                               |                          |                          |                                |                          |                          |                            |                          |
|-------------------------------|--------------------------|--------------------------|--------------------------------|--------------------------|--------------------------|----------------------------|--------------------------|
| completely<br><u>disagree</u> | disagree                 | disagree<br>a litte      | don't agree,<br>don't disagree | agree<br>a little        | agree                    | completely<br><u>agree</u> | not<br>applicable**      |
| <input type="checkbox"/>      | <input type="checkbox"/> | <input type="checkbox"/> | <input type="checkbox"/>       | <input type="checkbox"/> | <input type="checkbox"/> | <input type="checkbox"/>   | <input type="checkbox"/> |

Clarifications:

\* I have no complaints or problems / I did not think of anything to discuss

\*\* I don't have sleep apnea / no choice was made yet

## Questions about the PRAQ-report

**7. Your sleep center asked you to fill out a questionnaire before attending your consultation, about your health complaints and daily functioning (the PRAQ). Did you complete this questionnaire?**

- Yes
- Partially (go to question 12 at the bottom of this page)
- No (go to question 13, on the next page)

The results of the questionnaire are summarised in a report, with on the first page smileys for each topic. The questions below are about whether you looked at this report, and whether you thought this was useful. Answer each question in the way that fits you or your situation best. **Please answer the questions as well if you have not seen the report.**

**8. I looked at the report before my consultations with the doctor.**

- Yes, elaborately
- Yes, briefly
- No, not important or didn't get around to it
- No, I didn't know that there was a report or how to open it

**9. The report was shown during the consultation with the doctor (for example, you looked at the smileys together and discussed your health complaints)**

- Yes, elaborately
- Yes, briefly
- No, not at all

**10. I thought the report was useful as preparation of my consultation with the doctor**  
(if you did not look at the report beforehand, you may answer "not applicable")

- |                               |                          |                          |                                |                          |                          |                            |                          |
|-------------------------------|--------------------------|--------------------------|--------------------------------|--------------------------|--------------------------|----------------------------|--------------------------|
| completely<br><u>disagree</u> | disagree                 | disagree<br>a litte      | don't agree,<br>don't disagree | agree<br>a little        | agree                    | completely<br><u>agree</u> | not<br>applicable*       |
| <input type="checkbox"/>      | <input type="checkbox"/> | <input type="checkbox"/> | <input type="checkbox"/>       | <input type="checkbox"/> | <input type="checkbox"/> | <input type="checkbox"/>   | <input type="checkbox"/> |

**11. I thought the report was useful during my consultation with the doctor**

(If the report was not shown during the consultation, you may answer "not applicable")

- |                               |                          |                          |                                |                          |                          |                            |                          |
|-------------------------------|--------------------------|--------------------------|--------------------------------|--------------------------|--------------------------|----------------------------|--------------------------|
| completely<br><u>disagree</u> | disagree                 | disagree<br>a litte      | don't agree,<br>don't disagree | agree<br>a little        | agree                    | completely<br><u>agree</u> | not<br>applicable*       |
| <input type="checkbox"/>      | <input type="checkbox"/> | <input type="checkbox"/> | <input type="checkbox"/>       | <input type="checkbox"/> | <input type="checkbox"/> | <input type="checkbox"/>   | <input type="checkbox"/> |

**12. Is there anything else about the PRAQ-questionnaire or the report that you would like to share? We are happy to hear your opinion.**

**We would also like to know something about you.**

**13. What is your age?**    year

**14. Gender:**  man  woman

**15. What is the highest level of education you finished with a diploma?**

- No education (did not finish primary school)
- Primary school
- Basic vocational education (LTS, LEAO)
- General secondary education (MAVO, VMBO)
- Intermediate vocational education (MTS, MEAO, MBO)
- Senior secondary general education or pre-university education (HAVO, VWO, grammar school)
- Higher professional education (HBO, HEAO, HTS)
- University
- Other, which is: -----

**16. How bothered are you by the health complaints or problems for which you attended the sleep center today?**

Not bothered at all Very bothered

1  2  3  4  5  6  7  8  9  10

**17. Did the doctor diagnose you with sleep apnea?**

Yes, I have sleep apnea  No, I do not have sleep apnea  Don't know (yet)

**18. If you answered "yes" to the previous question, was a treatment chosen and if so, which one?**

- No treatment
- Yes, CPAP (mask)
- Yes, MRA (device over teeth)
- Yes, lifestyle advice
- Other, which is: -----

1  
2  
3 **SRQR**  
4  
5

| Topic / item                                                                                                                                                                                                                                                                                                                                                                                     | Response                                                                                                                                              |
|--------------------------------------------------------------------------------------------------------------------------------------------------------------------------------------------------------------------------------------------------------------------------------------------------------------------------------------------------------------------------------------------------|-------------------------------------------------------------------------------------------------------------------------------------------------------|
| S1 Title - Concise description of the nature and topic of the study Identifying the study as qualitative or indicating the approach (e.g., ethnography, grounded theory) or data collection methods (e.g., interview, focus group) is recommended                                                                                                                                                | We mention in the title that it is a mixed-methods study, but to keep the title brief we do not elaborate on the data collection methods in the title |
| S2 Abstract - Summary of key elements of the study using the abstract format of the intended publication; typically includes background, purpose, methods, results, and conclusions                                                                                                                                                                                                              | Abstract was structured as required by BMJ Open                                                                                                       |
| S3 Problem formulation - Description and significance of the problem/phenomenon studied; review of relevant theory and empirical work; problem statement                                                                                                                                                                                                                                         | Described in the introduction                                                                                                                         |
| S4 Purpose or research question                                                                                                                                                                                                                                                                                                                                                                  | Described in the introduction                                                                                                                         |
| S5 Qualitative approach and research paradigm - Qualitative approach (e.g., ethnography, grounded theory, case study, phenomenology, narrative research) and guiding theory if appropriate; identifying the research paradigm (e.g., postpositivist, constructivist/interpretivist) is also recommended; rationale                                                                               | Described in supplementary file 3                                                                                                                     |
| S6 Researcher characteristics and reflexivity - Researchers' characteristics that may influence the research, including personal attributes, qualifications/experience, relationship with participants, assumptions, and/or presuppositions; potential or actual interaction between researchers' characteristics and the research questions, approach, methods, results, and/or transferability | Described in supplementary file 3                                                                                                                     |
| S7 Context - Setting/site and salient contextual factors; rationale                                                                                                                                                                                                                                                                                                                              | Described in supplementary file 3                                                                                                                     |
| S8 - Sampling strategy                                                                                                                                                                                                                                                                                                                                                                           | Described in section 2.4 and supplementary file 3                                                                                                     |
| S9 - Ethical issues pertaining to human subjects - Documentation of approval by an appropriate ethics review board and participant consent, or explanation for lack thereof; other confidentiality and data security issues                                                                                                                                                                      | Ethics approval is described on page 17, informed consent in supplementary file 3                                                                     |
| S10 Data collection methods- Types of data collected; details of data collection procedures including (as appropriate) start and stop dates of data collection and analysis,                                                                                                                                                                                                                     | Described in the methods section 2.4, for as far as relevant. No modification of procedures took place.                                               |

|                                              |                                                                                                                                                                                                                                                    |                                                                                                                                                                               |
|----------------------------------------------|----------------------------------------------------------------------------------------------------------------------------------------------------------------------------------------------------------------------------------------------------|-------------------------------------------------------------------------------------------------------------------------------------------------------------------------------|
| 1<br>2<br>3<br>4<br>5<br>6<br>7              | iterative process, triangulation of sources/methods, and modification of procedures in response to evolving study findings; rationale                                                                                                              |                                                                                                                                                                               |
| 8<br>9<br>10<br>11<br>12<br>13<br>14         | S11 Data collection instruments and technologies - Description of instruments (e.g., interview guides, questionnaires) and devices (e.g., audio recorders) used for data collection; if/how the instrument(s) changed over the course of the study | Described in section 2.4 and supplementary file 3. The instruments did not change over time.                                                                                  |
| 15<br>16<br>17<br>18<br>19                   | S12 Units of study - Number and relevant characteristics of participants, documents, or events included in the study; level of participation (could be reported in results)                                                                        | Described in section 2.4                                                                                                                                                      |
| 20<br>21<br>22<br>23<br>24<br>25<br>26<br>27 | S13 - Methods for processing data prior to and during analysis, including transcription, data entry, data management and security, verification of data integrity, data coding, and anonymization/deidentification of excerpts                     | Described in supplementary file 3                                                                                                                                             |
| 28<br>29<br>30<br>31<br>32<br>33             | S14 – Data analysis - Process by which inferences, themes, etc., were identified and developed, including the researchers involved in data analysis; usually references a specific paradigm or approach; rationale                                 | Described in supplementary file 3.                                                                                                                                            |
| 34<br>35<br>36<br>37<br>38<br>39             | S15 - Techniques to enhance trustworthiness - Techniques to enhance trustworthiness and credibility of data analysis (e.g., member checking, audit trail, triangulation); rationale                                                                | This was not performed, now mentioned in supplementary file 3.                                                                                                                |
| 40<br>41<br>42<br>43<br>44<br>45             | S16 - Synthesis and interpretation - Main findings (e.g., interpretations, inferences, and themes); might include development of a theory or model, or integration with prior research or theory                                                   | Described in results section 3.1                                                                                                                                              |
| 46<br>47<br>48<br>49                         | S17 Links to empirical data - Evidence (e.g., quotes, field notes, text excerpts, photographs) to substantiate analytic findings                                                                                                                   | Quotes are provided in results section 3.1                                                                                                                                    |
| 50<br>51<br>52<br>53                         | S18 - Integration with prior work, implications, transferability, and contribution(s) to the field                                                                                                                                                 | Described in discussion section. We do not claim transferability as this was the evaluation of a very specific intervention, and this study was not aimed at transferability. |
| 54                                           | S19 - Limitations                                                                                                                                                                                                                                  | Described in the discussion section                                                                                                                                           |
| 55<br>56                                     | S20 - Conflicts of interest                                                                                                                                                                                                                        | No conflicts of interest, mentioned in the additional information below the manuscript                                                                                        |
| 57<br>58<br>59<br>60                         | S21 - Funding                                                                                                                                                                                                                                      | Funder did not have any influence on the study or article, mentioned in the additional information below the manuscript                                                       |



1  
2  
3  
4  
5  
6  
7  
8  
9  
10  
11  
12  
13  
14  
15  
16  
17  
18  
19  
20  
21  
22  
23  
24  
25  
26  
27  
28  
29  
30  
31  
32  
33  
34  
35  
36  
37  
38  
39  
40  
41  
42  
43  
44  
45  
46  
47  
48  
49  
50  
51  
52  
53  
54  
55  
56  
57  
58  
59  
60

## STROBE Statement—checklist of items that should be included in reports of observational studies

|                          | Item No | Recommendation                                                                                                                                                                                                                                                                                                                                                                                                                                                         | Response                                                                                                             |
|--------------------------|---------|------------------------------------------------------------------------------------------------------------------------------------------------------------------------------------------------------------------------------------------------------------------------------------------------------------------------------------------------------------------------------------------------------------------------------------------------------------------------|----------------------------------------------------------------------------------------------------------------------|
| Title and abstract       | 1       | (a) Indicate the study's design with a commonly used term in the title or the abstract                                                                                                                                                                                                                                                                                                                                                                                 | This was done.                                                                                                       |
|                          |         | (b) Provide in the abstract an informative and balanced summary of what was done and what was found                                                                                                                                                                                                                                                                                                                                                                    | This was done.                                                                                                       |
| <b>Introduction</b>      |         |                                                                                                                                                                                                                                                                                                                                                                                                                                                                        |                                                                                                                      |
| Background/rationale     | 2       | Explain the scientific background and rationale for the investigation being reported                                                                                                                                                                                                                                                                                                                                                                                   | Described in the introduction section                                                                                |
| Objectives               | 3       | State specific objectives, including any prespecified hypotheses                                                                                                                                                                                                                                                                                                                                                                                                       | Described in introduction section and methods section 2.1                                                            |
| <b>Methods</b>           |         |                                                                                                                                                                                                                                                                                                                                                                                                                                                                        |                                                                                                                      |
| Study design             | 4       | Present key elements of study design early in the paper                                                                                                                                                                                                                                                                                                                                                                                                                | Described in first paragraph of methods                                                                              |
| Setting                  | 5       | Describe the setting, locations, and relevant dates, including periods of recruitment, exposure, follow-up, and data collection                                                                                                                                                                                                                                                                                                                                        | Described in section 2.2, 2.3, and sections 2.5 and 2.6.                                                             |
| Participants             | 6       | (a) <i>Cohort study</i> —Give the eligibility criteria, and the sources and methods of selection of participants. Describe methods of follow-up<br><i>Case-control study</i> —Give the eligibility criteria, and the sources and methods of case ascertainment and control selection. Give the rationale for the choice of cases and controls<br><i>Cross-sectional study</i> —Give the eligibility criteria, and the sources and methods of selection of participants | Sources and selection of participants for the quantitative parts of the study are described in sections 2.5 and 2.6. |
|                          |         | (b) <i>Cohort study</i> —For matched studies, give matching criteria and number of exposed and unexposed<br><i>Case-control study</i> —For matched studies, give matching criteria and the number of controls per case                                                                                                                                                                                                                                                 | Not applicable                                                                                                       |
| Variables                | 7       | Clearly define all outcomes, exposures, predictors, potential confounders, and effect modifiers. Give diagnostic criteria, if applicable                                                                                                                                                                                                                                                                                                                               | When relevant, these are described in the methods sections 2.5 and 2.6                                               |
| Data sources/measurement | 8*      | For each variable of interest, give sources of data and details of methods of assessment (measurement). Describe comparability of assessment methods if there is more than one group                                                                                                                                                                                                                                                                                   | This is described in sections 2.5 and 2.6                                                                            |
| Bias                     | 9       | Describe any efforts to address potential sources of bias                                                                                                                                                                                                                                                                                                                                                                                                              | We discuss bias in the discussion but did not make specific efforts to tackle it beforehand, so not described        |
| Study size               | 10      | Explain how the study size was arrived at                                                                                                                                                                                                                                                                                                                                                                                                                              | The size of this exploratory study was arrived at through practical choices (time of                                 |

|                        |    |                                                                                                                                                                                                                                                                                                           |                                                                                         |
|------------------------|----|-----------------------------------------------------------------------------------------------------------------------------------------------------------------------------------------------------------------------------------------------------------------------------------------------------------|-----------------------------------------------------------------------------------------|
|                        |    |                                                                                                                                                                                                                                                                                                           | inclusion 2 months)                                                                     |
| Quantitative variables | 11 | Explain how quantitative variables were handled in the analyses. If applicable, describe which groupings were chosen and why                                                                                                                                                                              | Described in section 2.7                                                                |
| Statistical methods    | 12 | (a) Describe all statistical methods, including those used to control for confounding                                                                                                                                                                                                                     | Described in section 2.7. No correction for confounding took place.                     |
|                        |    | (b) Describe any methods used to examine subgroups and interactions                                                                                                                                                                                                                                       | Not relevant.                                                                           |
|                        |    | (c) Explain how missing data were addressed                                                                                                                                                                                                                                                               | Missing data are reported in the results section but they were not otherwise addressed. |
|                        |    | (d) <i>Cohort study</i> —If applicable, explain how loss to follow-up was addressed<br><i>Case-control study</i> —If applicable, explain how matching of cases and controls was addressed<br><i>Cross-sectional study</i> —If applicable, describe analytical methods taking account of sampling strategy | Not applicable                                                                          |
|                        |    | (e) Describe any sensitivity analyses                                                                                                                                                                                                                                                                     | Not applicable                                                                          |

|                  |     |                                                                                                                                                                                                              |                                                                                                                                                           |
|------------------|-----|--------------------------------------------------------------------------------------------------------------------------------------------------------------------------------------------------------------|-----------------------------------------------------------------------------------------------------------------------------------------------------------|
| <b>Results</b>   |     |                                                                                                                                                                                                              |                                                                                                                                                           |
| Participants     | 13* | (a) Report numbers of individuals at each stage of study—eg numbers potentially eligible, examined for eligibility, confirmed eligible, included in the study, completing follow-up, and analysed            | Not available, as survey distribution was done by the healthcare professionals. Non-eligible participants of the health record study were not registered. |
|                  |     | (b) Give reasons for non-participation at each stage                                                                                                                                                         | Not applicable                                                                                                                                            |
|                  |     | (c) Consider use of a flow diagram                                                                                                                                                                           | Not applicable                                                                                                                                            |
| Descriptive data | 14* | (a) Give characteristics of study participants (eg demographic, clinical, social) and information on exposures and potential confounders                                                                     | Described in results sections 3.2 and 3.3                                                                                                                 |
|                  |     | (b) Indicate number of participants with missing data for each variable of interest                                                                                                                          | Indicated in table 4 for the survey, and in table 8 for the health record study                                                                           |
|                  |     | (c) <i>Cohort study</i> —Summarise follow-up time (eg, average and total amount)                                                                                                                             | Not applicable                                                                                                                                            |
| Outcome data     | 15* | <i>Cohort study</i> —Report numbers of outcome events or summary measures over time                                                                                                                          | We have reported the results of the intervention and control group in the results sections 3.2 and 3.3                                                    |
|                  |     | <i>Case-control study</i> —Report numbers in each exposure category, or summary measures of exposure                                                                                                         |                                                                                                                                                           |
|                  |     | <i>Cross-sectional study</i> —Report numbers of outcome events or summary measures                                                                                                                           |                                                                                                                                                           |
| Main results     | 16  | (a) Give unadjusted estimates and, if applicable, confounder-adjusted estimates and their precision (eg, 95% confidence interval). Make clear which confounders were adjusted for and why they were included | Not applicable                                                                                                                                            |
|                  |     | (b) Report category boundaries when continuous variables were                                                                                                                                                | Relevant for one variable                                                                                                                                 |

|                          |    |                                                                                                                                                                            |                                                                                                         |
|--------------------------|----|----------------------------------------------------------------------------------------------------------------------------------------------------------------------------|---------------------------------------------------------------------------------------------------------|
|                          |    | categorized                                                                                                                                                                | (CPAP compliance) reported in table 8                                                                   |
|                          |    | (c) If relevant, consider translating estimates of relative risk into absolute risk for a meaningful time period                                                           | Not applicable                                                                                          |
| Other analyses           | 17 | Report other analyses done—eg analyses of subgroups and interactions, and sensitivity analyses                                                                             | Not applicable                                                                                          |
| <b>Discussion</b>        |    |                                                                                                                                                                            |                                                                                                         |
| Key results              | 18 | Summarise key results with reference to study objectives                                                                                                                   | Described in 3.2 and 3.3                                                                                |
| Limitations              | 19 | Discuss limitations of the study, taking into account sources of potential bias or imprecision. Discuss both direction and magnitude of any potential bias                 | Discussed in the limitations section                                                                    |
| Interpretation           | 20 | Give a cautious overall interpretation of results considering objectives, limitations, multiplicity of analyses, results from similar studies, and other relevant evidence | This was done.                                                                                          |
| Generalisability         | 21 | Discuss the generalisability (external validity) of the study results                                                                                                      | Since this was an explorative study with a very specific intervention, we do not claim generalisability |
| <b>Other information</b> |    |                                                                                                                                                                            |                                                                                                         |
| Funding                  | 22 | Give the source of funding and the role of the funders for the present study and, if applicable, for the original study on which the present article is based              | This is present in the additional information below the manuscript.                                     |

\*Give information separately for cases and controls in case-control studies and, if applicable, for exposed and unexposed groups in cohort and cross-sectional studies.

**Note:** An Explanation and Elaboration article discusses each checklist item and gives methodological background and published examples of transparent reporting. The STROBE checklist is best used in conjunction with this article (freely available on the Web sites of PLoS Medicine at <http://www.plosmedicine.org/>, Annals of Internal Medicine at <http://www.annals.org/>, and Epidemiology at <http://www.epidem.com/>). Information on the STROBE Initiative is available at [www.strobe-statement.org](http://www.strobe-statement.org).
