# Supplementary material for: Does the Patient-Reported Apnea Questionnaire (PRAQ) increase patient-centredness in the daily practice of sleep centres? a mixed-methods study
Source: PubMed Central journal article supplement — BMJ Open. 2019 Jun 14;9(6):e025963. doi: 10.1136/bmjopen-2018-025963 (PMC6585829; doi:10.1136/bmjopen-2018-025963), 2019-06-14
Supplement: bmjopen-2018-025963supp002.pdf [file bmjopen-2018-025963supp002.pdf]

## Supplementary file 2 – The Patient-Reported Apnea Questionnaire (PRAQ) and PRAQ-report

|                                                                                                                                                                                                                                                                                                                                                                                                                                                                                                                                                                                                                                                             |
|-------------------------------------------------------------------------------------------------------------------------------------------------------------------------------------------------------------------------------------------------------------------------------------------------------------------------------------------------------------------------------------------------------------------------------------------------------------------------------------------------------------------------------------------------------------------------------------------------------------------------------------------------------------|
| <b>Symptoms at night</b>                                                                                                                                                                                                                                                                                                                                                                                                                                                                                                                                                                                                                                    |
| During the past 4 weeks, did you have a problem with:<br>1. Snoring loudly?<br>2. Waking up frequently to urinate?<br>3. Waking up at night with the feeling that you are choking?<br>4. A feeling that you are sleeping restlessly?<br>5. Having a dry or painful mouth when you wake up?<br>6. Waking up in the morning with a headache?                                                                                                                                                                                                                                                                                                                  |
| <b>Sleepiness</b>                                                                                                                                                                                                                                                                                                                                                                                                                                                                                                                                                                                                                                           |
| During the past 4 weeks, did you have a problem with:<br>7. Fighting to stay awake during the day?<br>8. Suddenly falling asleep?<br>9. Difficulty staying awake during a conversation?<br>10. Difficulty staying awake while watching something? (concert, movie, television)<br>11. Falling asleep at inappropriate times or places?                                                                                                                                                                                                                                                                                                                      |
| <b>Tiredness</b>                                                                                                                                                                                                                                                                                                                                                                                                                                                                                                                                                                                                                                            |
| During the past 4 weeks, did you have a problem with:<br>12. Feeling very tired?<br>13. Lacking energy?<br>14. Still feeling tired when you wake up in the morning?                                                                                                                                                                                                                                                                                                                                                                                                                                                                                         |
| <b>Daily activities</b>                                                                                                                                                                                                                                                                                                                                                                                                                                                                                                                                                                                                                                     |
| During the past 4 weeks:<br>15. How difficult was it for you to do your most important daily activity? (such as your job, studying, caring for the children, housework)<br>16. How often did you use all your energy to accomplish only your most important daily activity? (such as your job, studying, caring for the children, housework)<br>17. Did you feel you have a decreased performance with regard to your most important daily activity? (such as your job, studying, caring for the children, housework)<br>18. How much difficulty did you have finding energy for your hobbies?<br>19. How difficult was it for you to get your chores done? |
| <b>Unsafe situations</b>                                                                                                                                                                                                                                                                                                                                                                                                                                                                                                                                                                                                                                    |
| During the past 4 weeks:<br>20. Did you have problems while driving a car due to sleepiness? <sup>1</sup><br>21. Were you concerned about your safety or that of others due to your sleepiness? (for example in traffic, or when operating machinery)                                                                                                                                                                                                                                                                                                                                                                                                       |
| <b>Memory and concentration</b>                                                                                                                                                                                                                                                                                                                                                                                                                                                                                                                                                                                                                             |
| During the past 4 weeks:<br>22. Were you sometimes forgetful?<br>23. Did you sometimes have difficulty concentrating?                                                                                                                                                                                                                                                                                                                                                                                                                                                                                                                                       |
| <b>Quality of sleep</b>                                                                                                                                                                                                                                                                                                                                                                                                                                                                                                                                                                                                                                     |
| During the past 4 weeks, did you have a problem with:<br>24. Falling asleep when you go to bed at night?<br>25. Getting back to sleep after you woke up at night?                                                                                                                                                                                                                                                                                                                                                                                                                                                                                           |
| <b>Emotions</b>                                                                                                                                                                                                                                                                                                                                                                                                                                                                                                                                                                                                                                             |
| During the past 4 weeks:<br>26. How often did you feel depressed or hopeless?<br>27. How often did you feel anxious?<br>28. How often did you lose your temper?<br>29. How often did you feel that you could not cope with everyday life?<br>30. How often did you feel irritated?<br>31. How often did you have a strong emotional reaction to everyday events?                                                                                                                                                                                                                                                                                            |

|                            |
|----------------------------|
| <b>Social interactions</b> |
|----------------------------|

|                          |
|--------------------------|
| During the past 4 weeks: |
|--------------------------|

- |                                                                                                                            |
|----------------------------------------------------------------------------------------------------------------------------|
| 32. Did you sometimes feel upset because others were disturbed by your snoring?                                            |
| 33. Was it a problem for you that you sometimes had no energy or no desire to do things with your family or your friends?  |
| 34. Did you feel guilty towards your family or friends?                                                                    |
| 35. Did you feel upset because you argued frequently?                                                                      |
| 36. Did you sometimes experience problems in the relationship with your partner? <sup>1</sup>                              |
| 37. Did you feel upset because you could (maybe) not sleep in the same room as your partner? <sup>1</sup>                  |
| 38. Did you sometimes think up excuses because you were tired or sleepy?                                                   |
| 39. Did you have a problem with unsatisfying and/or too little sexual activity? (by yourself or with another) <sup>1</sup> |

|                        |
|------------------------|
| <b>Health concerns</b> |
|------------------------|

- |                                                                                                                                                                     |
|---------------------------------------------------------------------------------------------------------------------------------------------------------------------|
| 40. Were you concerned about other conditions that may be related to sleep apnea? (such as diabetes, high blood pressure, cardiovascular disease, being overweight) |
|---------------------------------------------------------------------------------------------------------------------------------------------------------------------|

1. These items had an additional response option “not applicable” or (for item 39) “no answer”
